# Supplementary material for: Early Evolution of the Mitogen-Activated Protein Kinase Family in the Plant Kingdom
Source: PubMed Central journal article supplement (PMC6411719; doi:10.1038/s41598-019-40751-y), 2019-03-11
Supplement: 41598_2019_40751_MOESM1_ESM.pdf [file 41598_2019_40751_MOESM1_ESM.pdf]

# Early Evolution of the Mitogen-Activated Protein Kinase Family in the Plant Kingdom

**Balázs Kalapos<sup>1,2</sup>, Monika Hlavová<sup>3</sup>, Tímea V. Nádai<sup>1,2</sup>, Gábor Galiba<sup>1,2</sup>,  
Kateřina Bišová<sup>3</sup> and Róbert Dóczi<sup>1</sup>**

<sup>1</sup> Institute of Agriculture, Centre for Agricultural Research of the Hungarian Academy of Sciences, H-2462 Martonvásár, Brunszvik u. 2, Hungary

<sup>2</sup> Fesztetics Doctoral School, Georgikon Faculty, University of Pannonia, 8360 Keszthely, Hungary

<sup>3</sup> Centre Algatech, Institute of Microbiology Academy of Sciences of the Czech Republic, Opatovický mlyn, CZ 379 81, Třeboň, Czech Republic

\* Correspondence to: Róbert Dóczi, [doczi.robert@agrar.mta.hu](mailto:doczi.robert@agrar.mta.hu)

Authors' e-mail addresses:

Balázs Kalapos: [kalapos.balazs@agrar.mta.hu](mailto:kalapos.balazs@agrar.mta.hu)  
Monika Hlavová: [hlavova@alga.cz](mailto:hlavova@alga.cz)  
Tímea V. Nádai: [nadai.timea@agrar.mta.hu](mailto:nadai.timea@agrar.mta.hu)  
Gábor Galiba: [galiba.gabor@agrar.mta.hu](mailto:galiba.gabor@agrar.mta.hu)  
Kateřina Bišová: [bisova@alga.cz](mailto:bisova@alga.cz)  
Róbert Dóczi: [doczi.robert@agrar.mta.hu](mailto:doczi.robert@agrar.mta.hu)

# Supplementary Materials

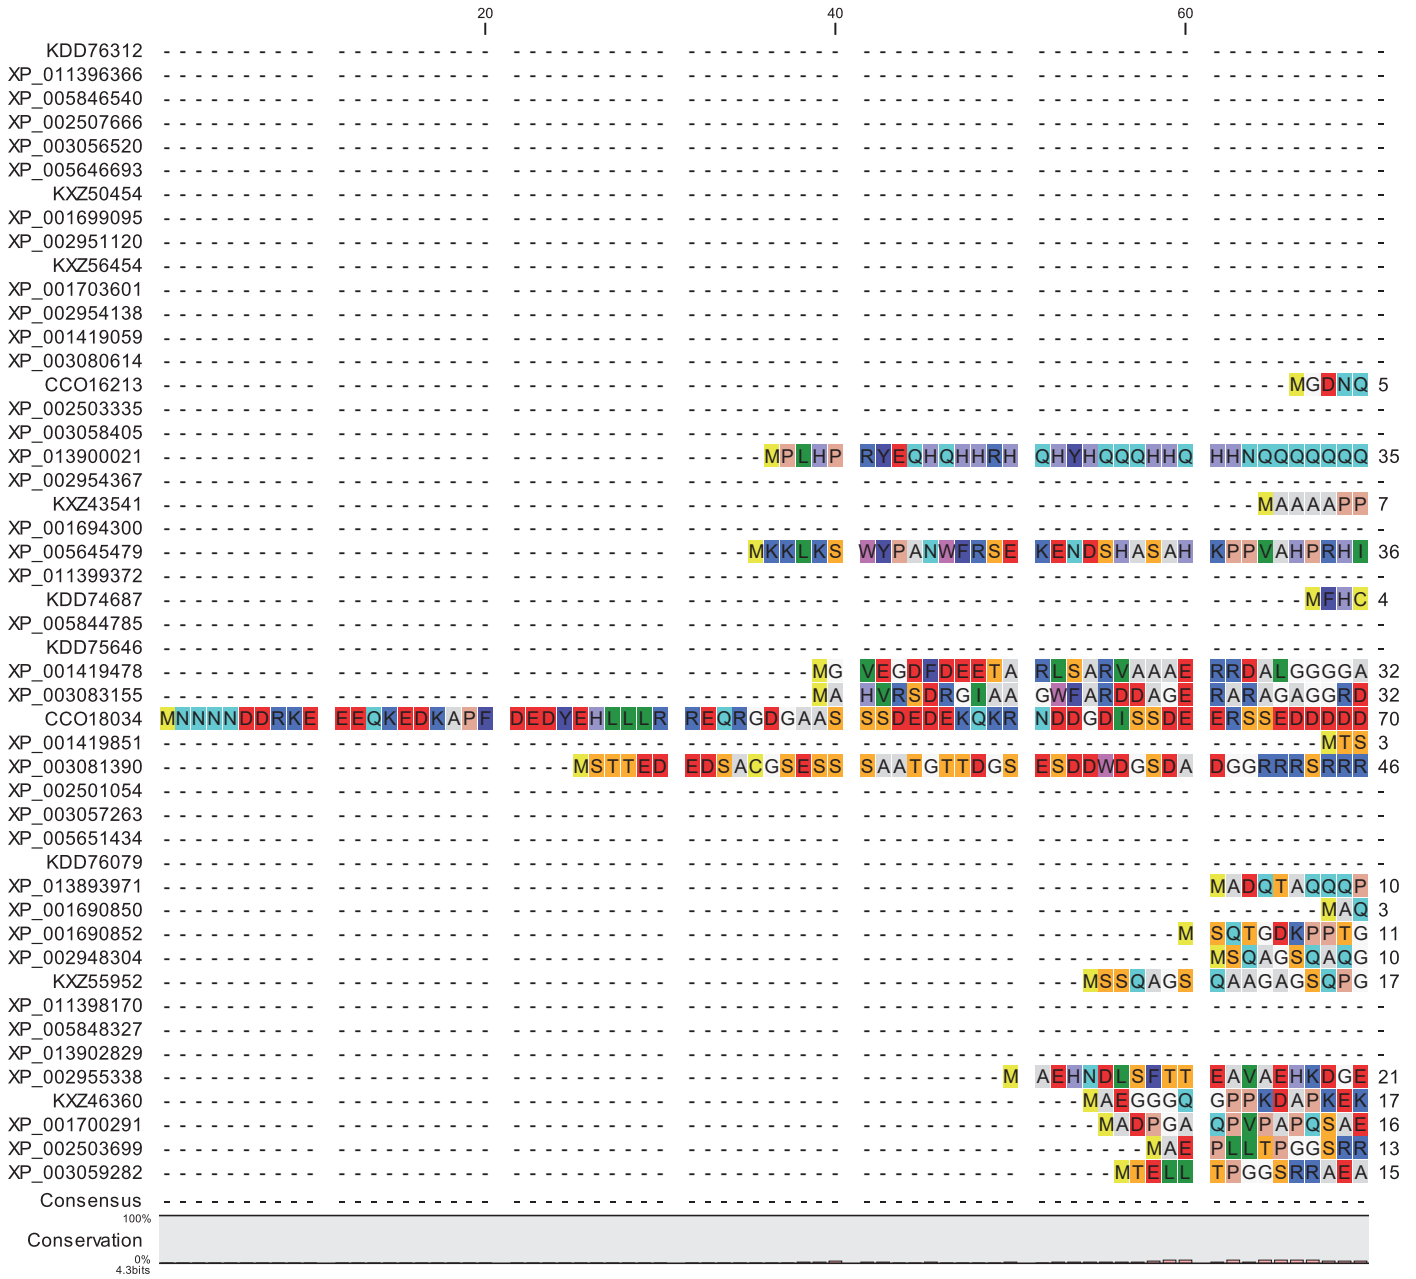

Sequence logo

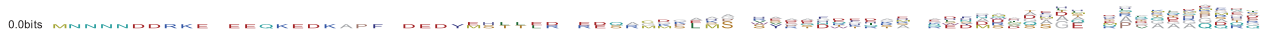

|              | 80    | 100   | 120   | 140   |
|--------------|-------|-------|-------|-------|
| KDD76312     | ----- | ----- | ----- | ----- |
| XP_011396366 | ----- | ----- | ----- | ----- |
| XP_005846540 | ----- | ----- | ----- | ----- |
| XP_002507666 | ----- | ----- | ----- | ----- |
| XP_003056520 | ----- | ----- | ----- | ----- |
| XP_005646693 | ----- | ----- | ----- | ----- |
| KXZ50454     | ----- | ----- | ----- | ----- |
| XP_001699095 | ----- | ----- | ----- | ----- |
| XP_002951120 | ----- | ----- | ----- | ----- |
| KXZ56454     | ----- | ----- | ----- | ----- |
| XP_001703601 | ----- | ----- | ----- | ----- |
| XP_002954138 | ----- | ----- | ----- | ----- |
| XP_001419059 | ----- | ----- | ----- | ----- |
| XP_003080614 | ----- | ----- | ----- | ----- |
| CCO16213     | ----- | ----- | ----- | ----- |
| XP_002503335 | ----- | ----- | ----- | ----- |
| XP_003058405 | ----- | ----- | ----- | ----- |
| XP_013900021 | ----- | ----- | ----- | ----- |
| XP_002954367 | ----- | ----- | ----- | ----- |
| KXZ43541     | ----- | ----- | ----- | ----- |
| XP_001694300 | ----- | ----- | ----- | ----- |
| XP_005645479 | ----- | ----- | ----- | ----- |
| XP_011399372 | ----- | ----- | ----- | ----- |
| KDD74687     | ----- | ----- | ----- | ----- |
| XP_005844785 | ----- | ----- | ----- | ----- |
| KDD75646     | ----- | ----- | ----- | ----- |
| XP_001419478 | ----- | ----- | ----- | ----- |
| XP_003083155 | ----- | ----- | ----- | ----- |
| CCO18034     | ----- | ----- | ----- | ----- |
| XP_001419851 | ----- | ----- | ----- | ----- |
| XP_003081390 | ----- | ----- | ----- | ----- |
| XP_002501054 | ----- | ----- | ----- | ----- |
| XP_003057263 | ----- | ----- | ----- | ----- |
| XP_005651434 | ----- | ----- | ----- | ----- |
| KDD76079     | ----- | ----- | ----- | ----- |
| XP_013893971 | ----- | ----- | ----- | ----- |
| XP_001690850 | ----- | ----- | ----- | ----- |
| XP_001690852 | ----- | ----- | ----- | ----- |
| XP_002948304 | ----- | ----- | ----- | ----- |
| KXZ55952     | ----- | ----- | ----- | ----- |
| XP_011398170 | ----- | ----- | ----- | ----- |
| XP_005848327 | ----- | ----- | ----- | ----- |
| XP_013902829 | ----- | ----- | ----- | ----- |
| XP_002955338 | ----- | ----- | ----- | ----- |
| KXZ46360     | ----- | ----- | ----- | ----- |
| XP_001700291 | ----- | ----- | ----- | ----- |
| XP_002503699 | ----- | ----- | ----- | ----- |
| XP_003059282 | ----- | ----- | ----- | ----- |

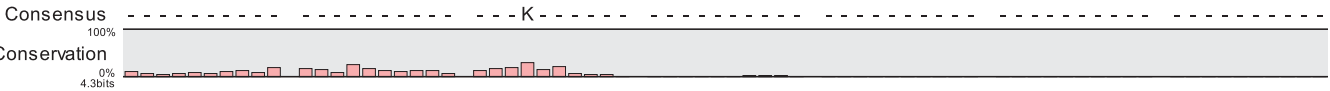

Sequence logo

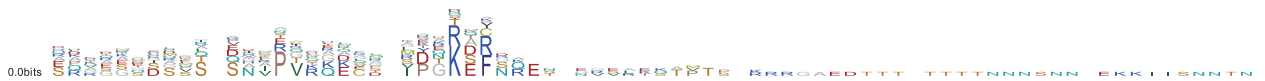

|              | 160        |      | 180       |              | 200        |           |           |       |        |     |
|--------------|------------|------|-----------|--------------|------------|-----------|-----------|-------|--------|-----|
| KDD76312     |            | MTED | DA        | SVLKKYELQQ   | KLGGAYGVV  | WRAID     | KRTKEV    | 38    |        |     |
| XP_011396366 |            |      |           |              |            |           |           |       |        |     |
| XP_005846540 |            | MSEE | DK        | HVLRKKYELVQQ | RLGGAYGVV  | WKAID     | KKTKET    | 38    |        |     |
| XP_002507666 |            | MSEE | DK        | HVLRKKYELVQQ | KLGGAYGLV  | WKSVD     | KKTRDV    | 38    |        |     |
| XP_003056520 |            | MGEE | DR        | HVLRKKYELVQQ | KLGGAYGVV  | WKTVD     | KKTRDT    | 38    |        |     |
| XP_005646693 |            | MSAN | VEEDK     | HVFRKKYELHA  | KLGGAYGVV  | WKAID     | KKTRDT    | 41    |        |     |
| KXZ50454     |            | MTEE | EVVK      | HILKKYELVQQ  | KLGGAYGVV  | WKAID     | KKTREY    | 39    |        |     |
| XP_001699095 |            | MTEE | EVVK      | HILKKYELVQQ  | KLGGAYGVV  | WKAID     | RKTREY    | 39    |        |     |
| XP_002951120 |            | MTEE | EVVK      | HILKKYELVQQ  | KLGGAYGVV  | WKAID     | RKTREY    | 39    |        |     |
| KXZ56454     |            |      |           | MESKRFSVMH   | ALGGSGYGVV | CLSRD     | NMTGQP    | 31    |        |     |
| XP_001703601 |            |      |           | SHRYTVHS     | LGGSGYGVV  | CAAKD     | NLTGEM    | 29    |        |     |
| XP_002954138 |            |      |           | SARYTVLN     | LGGSGYGVV  | CAAKD     | NLTGEM    | 29    |        |     |
| XP_001419059 |            | FANL | RESS      | NESARYEEL    | VLGGSGYGVV | CAAD      | RQTGNR    | 42    |        |     |
| XP_003080614 |            | FATA | SWTA      | NESQRYELLE   | VLGGSGYGVV | CAAD      | RESGQK    | 57    |        |     |
| CCO16213     |            |      | ISEF      | EDANRYSVHE   | VLGGSGYGVV | CSATD     | TKTDKK    | 66    |        |     |
| XP_002503335 |            | FTEY |           | GEANRFSIHE   | VLGGSGYGVV | CSATD     | NKTGEK    | 41    |        |     |
| XP_003058405 |            | FTEY | G         | ANRFTIHE     | VLGGSGYGVV | CSATD     | NKTGEK    | 41    |        |     |
| XP_013900021 |            | MDPK | EFFTDY    | GEANRYTIKE   | VLGGSGYGVV | CSAVD     | NYTGEK    | 104   |        |     |
| XP_002954367 |            | FAEA | VH        | AEANRYTIKE   | VLGGSGYGVV | CSAVD     | NFTGEK    | 44    |        |     |
| KXZ43541     |            | FAEA | VH        | AEANRYTIKE   | VLGGSGYGVV | CSAVD     | NFTGEK    | 70    |        |     |
| XP_001694300 |            | FAEA | VH        | AEANRYTIKE   | VLGGSGYGVV | CSAVD     | NFTGEK    | 44    |        |     |
| XP_005645479 |            | MDTK | EFFTEY    | GEANRYAIKE   | VLGGSGYGVV | CSAVD     | LKTGEK    | 105   |        |     |
| XP_011399372 |            | FAEA |           | TESQRYKITE   | VLGGSGYGVV |           | ASEK      | 34    |        |     |
| KDD74687     |            | FAEA |           | TESQRYKITE   | VLGGSGYGVV | ASATD     | QFTGEK    | 65    |        |     |
| XP_005844785 |            | FAEA |           | TEAORYKISE   | VLGGSGYGVV | ASAVD     | QFTGEK    | 41    |        |     |
| KDD75646     |            | FKVS | GVLV      | ECPCTYAPIK   | PIGGAYGVV  | CSASD     | SRGNER    | 56    |        |     |
| XP_001419478 |            | RRVW | GRHAF     | DVDERYDPIK   | TIGRGAYGVV | CSANN     | VAPLGARNT | 115   |        |     |
| XP_003083155 |            | RTTW | GRHAF     | DVDERYNPLK   | ILGRGAYGVV | CSAD      | GAPMA     | 109   |        |     |
| CCO18034     | KNDLEEEEQD | E    | GDDPYELTK | FVYC         | GNLF       | EVKKKYVPK | PIGGAYGLV | CSAKD | EKQNTK | 199 |
| XP_001419851 |            | FATC | GTVF      | EVDAKYAPK    | PIGGAYGVV  | CSARE     | LETNRK    | 66    |        |     |
| XP_003081390 |            | FATC | GTVF      | EVDAKYAPK    | PVGGAYGVV  | CSARE     | VETNRK    | 126   |        |     |
| XP_002501054 |            | MW   | RSLF      | EIDMKYVPK    | PIGGAYGVV  | CSAKD     | SETGEK    | 38    |        |     |
| XP_003057263 |            | YMW  | RSLF      | EIDMKYVPK    | PIGGAYGVV  | CSAKD     | SETGEK    | 57    |        |     |
| XP_005651434 |            | YSW  | GTLF      | EIDERYVPK    | ALGGAYGVV  | CSAKN     | VVTGEK    | 60    |        |     |
| KDD76079     |            |      |           |              |            |           |           |       |        |     |
| XP_013893971 |            | WVW  | RTNF      | EIDQHYQPK    | ALGGAYGVV  | CSAKN     | LATGEK    | 75    |        |     |
| XP_001690850 |            | YVW  | RSTF      | EIDDKYVPK    | ALGGAYGVV  | CSAKD     | TKTGEK    | 68    |        |     |
| XP_001690852 |            | FSW  | RTTF      | EIDTRYVPK    | ALGGAYGVV  | ASAKD     | STGEK     | 76    |        |     |
| XP_002948304 |            | WVW  | RTTF      | EIDDKYQPK    | ALGGAYGVV  | CSAKN     | LQTNEK    | 75    |        |     |
| KXZ55952     |            | WVW  | RTTF      | EIDDKYVPK    | ALGGAYGVV  | CSAKN     | SQTGEK    | 82    |        |     |
| XP_011398170 |            | YQW  | RTTF      | EIDESYVPK    | ALGGAYGVV  | CSAKH     | TPTGEK    | 61    |        |     |
| XP_005848327 |            | YQW  | RTNF      | EIDDKYQPK    | ALGGAYGVV  | CSAKN     | AETGEK    | 56    |        |     |
| XP_013902829 |            | STVC | GSLF      | ECPAKYAPK    | PIGRGAYGVV | W         |           | 30    |        |     |
| XP_002955338 |            | FLVC | GSLF      | ECPAKYLPK    | PIGGAYGVV  | CSAKN     | DSQEK     | 88    |        |     |
| KXZ46360     |            | FLVC | GSLF      | ECPAKYLPK    | PIGGAYGVV  | CSAKN     | LDTQEK    | 84    |        |     |
| XP_001700291 |            | FLVC | GSLF      | ECPAKYLPK    | PIGGAYGVV  | CSAKN     | LDNQEK    | 83    |        |     |
| XP_002503699 |            | FQVC | GNTF      | EVQARYAPK    | PIGGAYGVV  | CSARN     | VDTDEK    | 79    |        |     |
| XP_003059282 |            | FMC  | GNLF      | EVDAKYVPK    | PIGGAYGVV  | CSAKN     | AARPEK    | 82    |        |     |

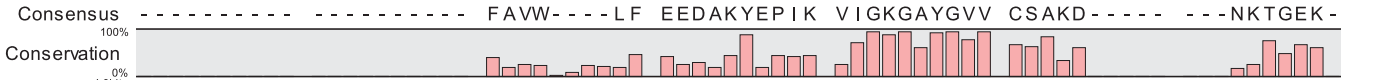

Sequence logo

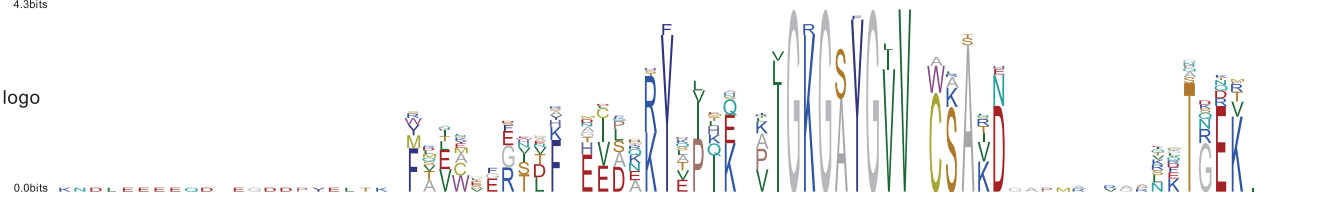

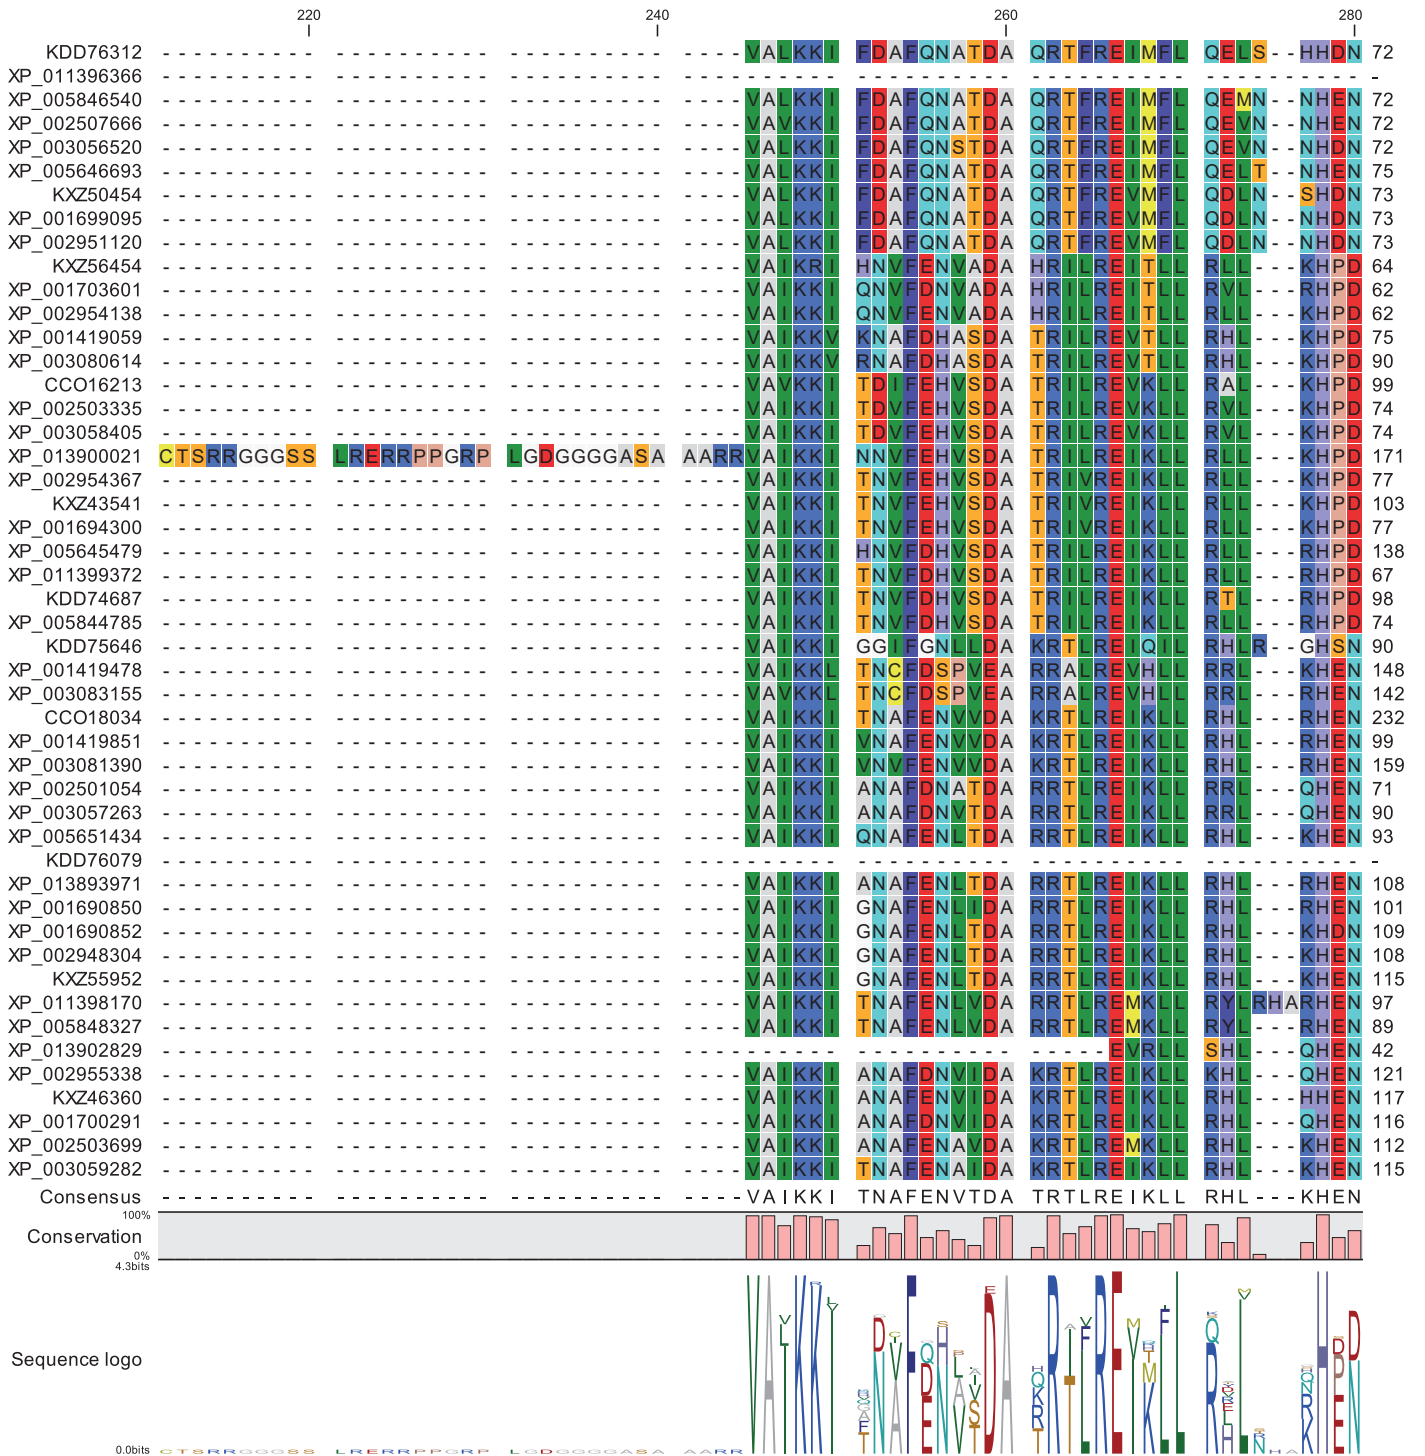

|               | 300       |       | 320   |            | 340        |            |          |   |        |     |     |
|---------------|-----------|-------|-------|------------|------------|------------|----------|---|--------|-----|-----|
| KDD76312      | RLLNVLKA  | -ENDR | D     | YLVTFEYMET | DLHAVRAN   | ILEDVHKRYI | MYQLFRAI | R | YCHSAG | LLH | 134 |
| XP_011396366  |           |       |       |            |            |            |          |   |        |     |     |
| XP_005846540  | RLLNVLKA  | -ENDR | D     | YLVTFEYMET | DLHAVRAN   | ILEEVHKQYI | MYQIFRSI | K | FMHSAQ | LLH | 134 |
| XP_002507666  | VRLLNVLKA | -ENDR | D     | YLVTFEYMET | DLHAVRAN   | ILEDVHKQYI | MYQLFKA  | K | YMHSAG | LLH | 134 |
| XP_003056520  | RLLNVLKA  | -ENDR | D     | YLVTFEYMET | DLHAVRAN   | ILEDVHKQYI | MYQLFKA  | K | FMHSAQ | LLH | 134 |
| XP_005646693  | RLLNVLKA  | -ENDR | D     | YLVTFEYMET | DLHAVRAN   | ILEEVHKQYI | MYQLFKA  | K | YMHSAG | LLH | 137 |
| KXZ50454      | RLLNVLKA  | -ENDR | D     | YLVTFEYMET | DLHAVRAN   | ILEEVHKQYI | MYQLFKA  | K | YMHSAG | LLH | 135 |
| XP_001699095  | VRLLNVLKA | -ENDR | D     | YLVTFEYMET | DLHAVRAN   | ILEEVHKQYI | MYQLFKA  | K | YMHSAG | LLH | 135 |
| XP_002951120  | RLLNVLKA  | -ENDR | D     | YLVTFEYMET | DLHAVRAN   | ILEEVHKQYI | MYQLFKA  | K | YMHSAG | LLH | 135 |
| KXZ56454      | VVEKHMLP  | -SDPN | RFKD  | LYVVFELMET | DLHQVIGAND | DLTRDHHKVF | LYQLLRGI | N | FLHTNN | VLH | 130 |
| XP_001703601  | VVEKHMLP  | -SDPN | TFKD  | LYVVFELMES | DLHTVIGAND | DLTADHHKVF | LYQLLRGI | N | FMHSAQ | VLH | 128 |
| XP_002954138  | VVEKHMLP  | -ADPN | TFKD  | LYVVFELMES | DLHTVIGAND | DLTRDHHKVF | LYQLLRGI | N | FMHTNN | VLH | 128 |
| XP_001419059  | VVEKHMPL  | -PNPR | DFND  | VYVVFELMET | DLHQVKAND  | DLTDEHHQFF | LYQLLRGI | K | YMHSAN | VFH | 141 |
| XP_003080614  | VVEKHMPL  | -PNPR | EFND  | VYVVFELMGT | DLHQVKAND  | DLTDEHHQFF | LYQLLRGI | K | YMHSAN | VFH | 156 |
| CCO16213      | VVEKHMPL  | -SNPR | EFKD  | VYVVFELMET | DLHQVKAND  | DLTDEHHQFF | LYQLLRGI | K | YVHTAN | VFH | 165 |
| XP_002503335  | VVEKHMPL  | -PNPR | EFKD  | VYVVFELMET | DLHQVKAND  | DLTDEHHQFF | LYQLLRGI | K | YVHTAN | VFH | 140 |
| XP_003058405  | VVEKHMPL  | -PNPR | EYKO  | VYVVFELMET | DLHQVKAND  | DLTDEHHQFF | LYQLLRGI | K | YVHTAN | VFH | 140 |
| XP_013900021  | VVEKHMPL  | -PSPR | DFKD  | VYVVFELMET | DLHQVKAND  | DLTPEHHQFF | LYQLLRGI | K | YHSAN  | VFH | 237 |
| XP_002954367  | VVEKHMPL  | -PSPK | EFKD  | VYVVFELMET | DLHQVKAND  | DLTPEHHQFF | LYQLLRGI | K | YHSAN  | VFH | 143 |
| KXZ43541      | VDEKHMPL  | -PSPK | DFKD  | VYVVFELMET | DLHQVIGAND | DLTPEHHQFF | LYQLLRGI | K | YHSAN  | VFH | 169 |
| XP_001694300  | VDEKHMPL  | -PSPK | DFKD  | VYVVFELMET | DLHQVIGAND | DLTPEHHQFF | LYQLLRGI | K | YHSAN  | VFH | 142 |
| XP_005645479  | VVEKHMPL  | -PSPR | EFKD  | VYVVFELMET | DLHQVKAND  | DLTPEHHQFF | LYQLLRGI | K | YHSAN  | VFH | 204 |
| XP_011399372  | VVEKHMPL  | -PSMH | DFKD  | VYVVFELMET | DLHQVKAND  | DLTPEHHQFF | LYQLLRGI | K | YHSAN  | VFH | 133 |
| KDD74687      | VVEKHMPL  | -PSPR | EFKD  | VYVVFELMET | DLHQVKAND  | DLTPEHHQFF | LYQLLRGI | K | YHSAN  | VFH | 164 |
| XP_005844785  | VVEKHMPL  | -PSAR | EFKD  | VYVVFELMET | DLHQVKAND  | DLTPEHHQFF | LYQLLRGI | K | YHSAN  | VFH | 140 |
| KDD75646      | VIGKDFPP  | -PAGP | EYND  | VYVVFELMET | DLHQVIRSPQ | PLSDEHQQFF | LYQLLRGI | K | FLHSGG | VLH | 157 |
| XP_001419478  | VKLEDVMP  | -VGN  | GRMDD | VYVVFELMET | DLHQVIRSKQ | ALLDEHQQFF | LYQLLRGI | K | YVHSAN | VLH | 215 |
| XP_003083155  | VKLEDVMP  | -TNE  | GRVSD | VYVVFELMET | DLHQVIRSDQ | TLLDEHQQFF | LYQLLRGI | K | YVHSAN | VLH | 209 |
| CCO18034      | VVPTDCMPL | SKEEE | YFND  | VYVVFELMET | DLHQVIRSDQ | PLTDDHQQFF | LYQLLRGI | K | YHSAN  | VLH | 300 |
| XP_001419851  | VVDKCVKP  | -RAKD | AFED  | VYVVFELMET | DLHQVIRSSQ | SLTDEHQQFF | LYQLLRGI | K | YHSAN  | VLH | 165 |
| XP_003081390  | VVDKCVRP  | -EAMD | AFED  | VYVVFELMET | DLHQVIRSSQ | SLTDEHQQFF | LYQLLRGI | K | YHSAN  | VLH | 225 |
| XP_002501054  | VLLKDMRP  | -PSKD | DFND  | VYVVFELMET | DLHQVIRSSQ | GSLDEHQQFF | LYQLLRGI | K | YVHTAQ | VLH | 137 |
| XP_003057263  | VLLKDMRP  | -PSAS | DFND  | VYVVFELMET | DLHQVIRSSQ | GSLDEHQQFF | LYQLLRGI | K | YVHTAQ | VLH | 156 |
| XP_005651434  | VAVRDLQP  | -VDEK | RFND  | VYVVFELMET | DLHQVIRSPQ | QLTDDHQQFF | LYQLLRGI | K | YVHTAN | VLH | 159 |
| KDD76079      |           |       |       |            |            |            |          |   |        |     |     |
| XP_013893971  | VAVRDLQP  | -ASSQ | SMRD  | VYVVFELMET | DLHQVIRSRQ | PLSDEHQQFF | LYQLLRGI | K | YVHSAN | VLH | 59  |
| XP_001690850  | VAVRDLQP  | -PARD | RFND  | VYVVFELMET | DLHQVIRSSQ | PLTNEHFQYF | LYQLLRGI | K | YVHSAN | VLH | 174 |
| XP_001690852  | VAVRDLQP  | -PSRD | NFND  | VYVVFELMET | DLHQVIRSSQ | PLTNEHFQYF | LYQLLRGI | K | YVHTAN | VLH | 167 |
| XP_001690852  | VAVRDLQP  | -PAKD | KFND  | VYVVFELMET | DLHQVIRSSQ | PLTNEHFQYF | LYQLLRGI | K | YVHTAN | VLH | 175 |
| XP_002948304  | VAVRDLQP  | -PSKD | KFND  | VYVVFELMET | DLHQVIRSSQ | PLTNEHFQYF | LYQLLRGI | K | YVHTAN | VLH | 174 |
| KXZ55952      | VAVRDLQP  | -PSKD | KFND  | VYVVFELMET | DLHQVIRSSQ | PLTNEHFQYF | LYQLLRGI | K | YVHTAN | VLH | 181 |
| XP_011398170  | VAVRDLQP  | -PPKA | PFND  | VYVVFELMET | DLHQVIRSSQ | PLTNEHFQYF | LYQLLRGI | K | YVHSAN | VLH | 163 |
| XP_005848327  | VAVRDLQP  | -ASRD | AFND  | VYVVFELMET | DLHQVIRSSQ | PLSDDHQQFF | LYQLLRGI | K | YHSAN  | VLH | 154 |
| XP_0013902829 | VAVRDLQP  | -PSGA | SFKD  | VYVVFELMET | DLHQVIRSPQ | PLSDDHQQFF | LYQLLRGI | K | YHSAN  | VLH | 109 |
| XP_002955338  | VAVRDLQP  | -MQRD | AFKD  | VYVVFELMET | DLHQVIRSPQ | QLSNDHSQYF | LYQLLRGI | K | YHSAN  | VLH | 187 |
| KXZ46360      | VAVRDLQP  | -MQRD | CFKD  | VYVVFELMET | DLHQVIRSPQ | PLSNDHSQYF | LYQLLRGI | K | YHSAN  | VLH | 183 |
| XP_001700291  | VAVRDLQP  | -TNRD | AFKD  | VYVVFELMET | DLHQVIRSNQ | ALSNDHSQYF | LYQLLRGI | K | YHSAN  | VLH | 182 |
| XP_002503699  | VAVRDLQP  | KKSVK | DYND  | VYVVFELMET | DLHQVIRSNQ | PLSDDHQQFF | LYQLLRGI | K | YVHSAN | VLH | 179 |
| XP_003059282  | VAVRDLQP  | -PPLE | TFND  | VYVVFELMET | DLHQVIRSSQ | PLSDDHQQFF | LYQLLRGI | K | YVHSAN | VLH | 181 |

Consensus IVEIKDMLP -PSPR-EFKD VYXVFELMDT DLHQVIRXNQ DLTDEHHQYF LYQLLRGL-K YXHSAN-VLH

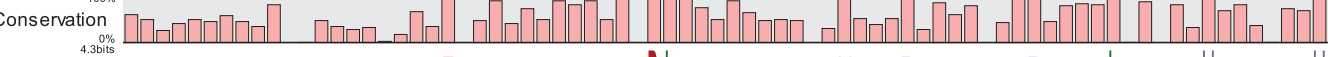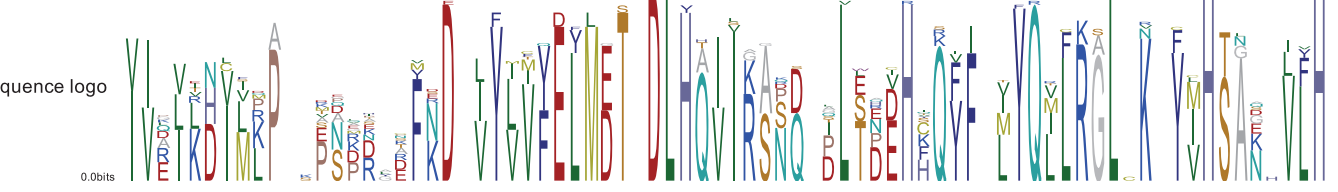

|              | 360  |         | 380      |    | 400      |        | 420       |           |            |       |            |            |            |     |
|--------------|------|---------|----------|----|----------|--------|-----------|-----------|------------|-------|------------|------------|------------|-----|
| KDD76312     | RDLK | -----PS | NVLLNSEC | SV | KLADFG   | LARA   | VSQGGAAPE | EGVPQLTDY | VATRWYRAPE | 190   |            |            |            |     |
| XP_011396366 |      |         |          |    |          |        |           |           |            | 35    |            |            |            |     |
| XP_005846540 | RDLK | YLMGWE  | GSSQEQAG | PS | NVLLNSEC | QV     | KMADFG    | LARS      | VAQ---     | LQT   | EEGNPVLTDY | VATRWYRAPE | 200        |     |
| XP_002507666 | RDLK |         |          | PS | NLLLNSEC | QM     | KLADFG    | LARS      | LTN---     | ADN   | KDSTPLTDY  | VATRWYRAPE | 187        |     |
| XP_003056520 | RDLK |         |          | PS | NLLLNSEC | QV     | KVADFG    | LARS      | MAIM---    | NKD   | LADRPVLT   | TDY        | VATRWYRAPE | 187 |
| XP_005646693 | RDLK |         |          | PS | NLLLNSEC | AV     | KLADFG    | LARS      | VAQL---    | EAD   | EGFSPVLT   | TDY        | VATRWYRAPE | 190 |
| KXZ50454     | RDLK |         |          | PS | NLLLNSEC | AV     | KLADFG    | LARS      | VSQ---     | NAA   | DGQNPVLT   | TDY        | VATRWYRAPE | 188 |
| XP_001699095 | RDLK |         |          | PS | NLLLNSEC | CMV    | KLADFG    | LARS      | VSQ---     | NAS   | DGQNPVLT   | TDY        | VATRWYRAPE | 188 |
| XP_002951120 | RDLK |         |          | PS | NLLLNSEC | QV     | KLADFG    | LARS      | VSQ---     | NAS   | DGQNPVLT   | TDY        | VATRWYRAPE | 188 |
| KXZ56454     | RDLK |         |          | PK | NLLANS   | NCKL   | KICDFG    | LARP      | CMDR---    | GAS   | SQSPV      | MWTDY      | VATRWYRAPE | 183 |
| XP_001703601 | RDLK |         |          | PK | NLLANS   | NCKL   | KICDFG    | LARP      | HLID-      | GAGAA | PLTPV      | LWTDY      | VATRWYRAPE | 183 |
| XP_002954138 | RDLK |         |          | PK | NLLANS   | NCKL   | KICDFG    | LARP      | IMG---     | NMT   | ALTPV      | LWTDY      | VATRWYRAPE | 180 |
| XP_001419059 | RDLK |         |          | PK | NLLANS   | SDCK   | KICDFG    | LARA      | MT---      | AKA   | GPQM       | FWTDY      | VATRWYRAPE | 192 |
| XP_003080614 | RDLK |         |          | PK | NLLANS   | SDCKL  | KICDFG    | LARA      | MT---      | AKT   | GPQM       | FWTDY      | VATRWYRAPE | 207 |
| CCO16213     | RDLK |         |          | PK | NLLANS   | ADCKL  | KICDFG    | LARP      | SF---      | HDQ   | GPTT       | VWTDY      | VATRWYRAPE | 216 |
| XP_002503335 | RDLK |         |          | PK | NLLANS   | ADCKL  | KICDFG    | LARP      | AF---      | HDS   | GPTT       | VWTDY      | VATRWYRAPE | 191 |
| XP_003058405 | RDLK |         |          | PK | NLLANS   | ADCKL  | KICDFG    | LARP      | AF---      | QDS   | GPTT       | FWTDY      | VATRWYRAPE | 191 |
| XP_013900021 | RDLK |         |          | PK | NLLANS   | SDCKL  | KICDFG    | LARP      | AF---      | ND    | MPTT       | VWTDY      | VATRWYRAPE | 287 |
| XP_002954367 | RDLK |         |          | PK | NLLANS   | SDCKL  | KICDFG    | LARP      | AF---      | TD    | MPTT       | VWTDY      | VATRWYRAPE | 193 |
| KXZ43541     | RDLK |         |          | PK | NLLANS   | SDCKL  | KICDFG    | LARP      | AF---      | ND    | MPTT       | VWTDY      | VATRWYRAPE | 219 |
| XP_001694300 | RDLK |         |          | PK | NLLANS   | SDCKL  | KICDFG    | LARP      | AF---      | ND    | MPTT       | VWTDY      | VATRWYRAPE | 192 |
| XP_005645479 | RDLK |         |          | PK | NLLANS   | ADCKL  | KVCDFG    | LARP      | SF---      | ND    | MPTT       | FWTDY      | VATRWYRAPE | 254 |
| XP_011399372 | RDLK |         |          | PK | NLLANS   | SDCKL  | KICDFG    | LARP      | AF---      | ND    | MPQT       | VWTDY      | VATRWYRAPE | 183 |
| KDD74687     | RDLK |         |          | PK | NLLANS   | SDCKL  | KICDFG    | LARP      | QF---      | ND    | APTT       | VWTDY      | VATRWYRAPE | 214 |
| XP_005844785 | RDLK |         |          | PK | NLLANS   | SDCKL  | KICDFG    | LARP      | AF---      | ND    | MPQT       | VWTDY      | VATRWYRAPE | 190 |
| KDD75646     | RDLK |         |          | PS | NLLLN    | NGNCDL | KICDFG    | LARA      | GS---      | DNN   | E---       | LMTEY      | VVTRWYRAPE | 204 |
| XP_001419478 | RDLK |         |          | PS | NLLLN    | NANCDL | KICDFG    | LARS      | MY---      | ERG   | R---       | MMTSY      | VVTRWYRAPE | 262 |
| XP_003083155 | RDLK |         |          | PS | NLLLN    | NANCDL | CICDFG    | LARS      | MY---      | EEG   | H---       | MMTSY      | VVTRWYRAPE | 256 |
| CCO18034     | RDLK |         |          | PS | NLLLN    | NANCDL | KICDFG    | LART      | NT---      | QDK   | NRD---     | FMTEY      | VVTRWYRAPE | 349 |
| XP_001419851 | RDLK |         |          | PG | NLLLN    | NANCDL | KICDFG    | LART      | AL---      | VD    | AEASE      | FMTEY      | VVTRWYRAPE | 215 |
| XP_003081390 | RDLK |         |          | PG | NLLLN    | NANCDL | KICDFG    | LART      | AL---      | VD    | AEASE      | FMTEY      | VVTRWYRAPE | 275 |
| XP_002501054 | RDLK |         |          | PS | NLLLN    | NANCDL | KICDFG    | LART      | SS---      | ERG   |            | FMTEY      | VVTRWYRAPE | 183 |
| XP_003057263 | RDLK |         |          | PS | NLLLN    | NANCDL | KICDFG    | LART      | DA---      | ERG   |            | FMTEY      | VVTRWYRAPE | 202 |
| XP_005651434 | RDLK |         |          | PS | NLLLN    | NASCDL | KICDFG    | LART      | LA---      | RQD   | RYSN-      | YMTEY      | VVTRWYRAPE | 209 |
| KDD76079     | RDLK |         |          | PS | NVLLN    | NASCDL | VICDFG    | LART      | ST---      | DSN   | A---       | FMTEY      | VVTRWYRAPE | 106 |
| XP_013893971 | RDLK |         |          | PS | NVLLN    | NASCDL | KICDFG    | LART      | ST---      | ERN   |            | FMTEY      | VVTRWYRAPE | 220 |
| XP_001690850 | RDLK |         |          | PS | NVLLN    | NASCDL | KICDFG    | LART      | GT---      | EKQ   | N---       | FMTEY      | VVTRWYRAPE | 214 |
| XP_001690852 | RDLK |         |          | PS | NVLLN    | NASCDL | KICDFG    | LART      | GS---      | ERN   |            | FMTEY      | VVTRWYRAPE | 221 |
| XP_002948304 | RDLK |         |          | PS | NVLLN    | NASCDL | KICDFG    | LART      | SA---      | EQN   | N---       | FMTEY      | VVTRWYRAPE | 221 |
| KXZ55952     | RDLK |         |          | PS | NVLLN    | NASCDL | KICDFG    | LART      | GS---      | ERN   |            | FMTEY      | VVTRWYRAPE | 227 |
| XP_011398170 | RDLK |         |          | PS | NVLLN    | NASCDL | KICDFG    | LART      | ST---      | ESN   | N---       | FMTEY      | VVTRWYRAPE | 210 |
| XP_005848327 | RDLK |         |          | PS | NVLLN    | NATCDL | KICDFG    | LART      | ST---      | ESN   | A---       | FMTEY      | VVTRWYRAPE | 201 |
| XP_013902829 | RDLK |         |          | PS | NVLLN    | NANCDL | RICDFG    | LART      | GN---      | QGA   | QEGVGM     | LTEY       | VVTRWYRAPE | 160 |
| XP_002955338 | RDLK |         |          | PS | NVLLN    | NANCDL | KICDFG    | LART      | ST---      | SNE   | KE---      | FMTEY      | VVTRWYRAPE | 235 |
| KXZ46360     | RDLK |         |          | PS | NVLLN    | NANCDL | KICDFG    | LART      | ST---      | SNE   | KE---      | FMTEY      | VVTRWYRAPE | 231 |
| XP_001700291 | RDLK |         |          | PS | NVLLN    | NANCDL | KICDFG    | LART      | ST---      | SNE   | KE---      | FMTEY      | VVTRWYRAPE | 230 |
| XP_002503699 | RDLK |         |          | PS | NVLLN    | NANCDL | KICDFG    | LART      | GR---      | EET   |            | FMTEY      | VVTRWYRAPE | 225 |
| XP_003059282 | RDLK |         |          | PS | NVLLN    | NANCDL | KICDFG    | LART      | AK---      | GPE   | D---       | FMTEY      | VVTRWYRAPE | 228 |

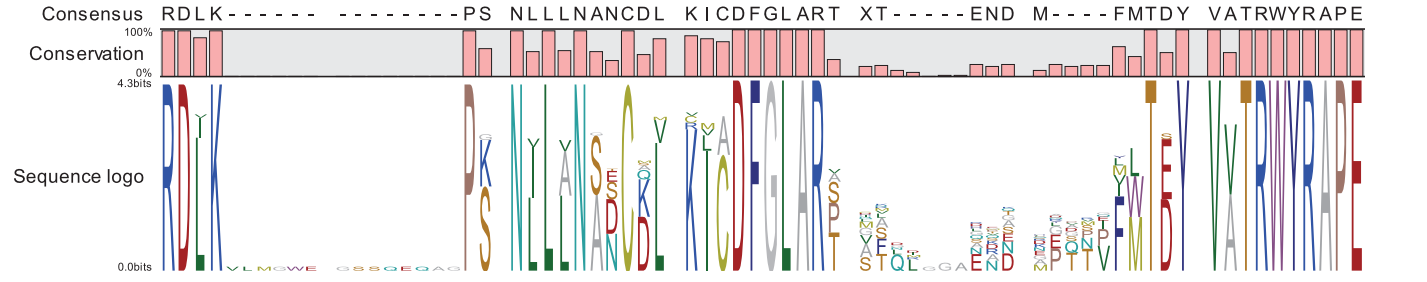

|              | 440          |             | 460         |            | 480        |            |             |     |
|--------------|--------------|-------------|-------------|------------|------------|------------|-------------|-----|
| KDD76312     | LLLS-SSTRYIT | AGVDMVAAGC  | LLGELLNGRA  | LFPGSSTMNQ | LDRLELTGR  | P-SSEDEEAM | RSPFAATMLD  | 258 |
| XP_011396366 | LLLS-SMRYIT  | YGVDMVACGC  | LLGELLNGKP  | VFPGTSTMNQ | LDRLELTGR  | P-CAEDVEAV | QSPFAATMLE  | 103 |
| XP_005846540 | LLLS-SHRYIT  | YGVDMVACGC  | LLGELLNGKP  | LFPGTSTMNQ | LDRLELTGR  | P-SPOQDS   | QSPFAATMLE  | 268 |
| XP_002507666 | LLLS-SSTRYIT | FGVDMVSSGC  | LLGELLGKGP  | LFPGTSTMNQ | LDRLELTGK  | P-ANEDVAV  | QSPFAATMLA  | 255 |
| XP_003056520 | LLLS-STKYIT  | FGVDMVSSGC  | LLGELLFRGQP | VFPGTSTMNQ | LDRLELTGK  | P-TEEDLA   | QSPFAATMLE  | 255 |
| XP_005646693 | LLLS-SPKYIT  | FGVDMVSSAGC | LLGELLTGKP  | LFPGSSTMNQ | LDRLELTGQ  | P-SQQVDAL  | ASPF AATMLE | 258 |
| KXZ50454     | LLLS-STKYIT  | FGVDMVSSGC  | LLGELLGKGP  | LFPGSSTMNQ | LDRLELFCGR | P-SPSDAA   | DSPFAATMMD  | 256 |
| XP_001699095 | LLLS-STKYIT  | FGVDMVSSGC  | LLGELLMGKP  | VFPGTSTMNQ | LDRLELFCGR | P-SPSDVEAL | DSPFAATMME  | 256 |
| XP_002951120 | LLLS-STKYIT  | FGVDMVSSGC  | LLGELLGKGP  | VFPGTSTMNQ | LDRLELFCGR | P-APADVEA  | DSPFAATMMD  | 256 |
| KXZ56454     | LCGC-FYGNYN  | GAVDMVSSIGC | IFAEVLQGKP  | LFPGKDAAGQ | LQLVTDLLGK | P-SPAVINNV | TNAKARKVLQ  | 252 |
| XP_001703601 | LCGC-FYGRYS  | SAVDMVSSIGC | IFAEVLLGKP  | LFPGRDAVHQ | LQLVTDLLGK | P-PPHVDA   | GNVKARAFLN  | 252 |
| XP_002954138 | LCGC-FYGRYT  | SAVDMVSSIGC | IFAEVLLGKP  | LFPGRDAVHQ | LQLVTDLLGK | P-SQAVIEAL | TNAKARKVLQ  | 249 |
| XP_001419059 | LCGS-FFTKYT  | PAIDVWSIGC  | IFAEVLRGKP  | LFPGKNVVKQ | LELTDLLGT  | P-TPLQAKV  | RNEKARRFLQ  | 261 |
| XP_003080614 | LCGS-FFTKYT  | PAIDVWSIGC  | IFAEVLRGKP  | LFPGKNVVKQ | LELTDLLGT  | P-TPLQAKV  | RNEKARRFLQ  | 276 |
| CCO16213     | LCGS-FFTKYT  | PAIDVWSIGC  | IFAEVLRGKP  | LFPGKNVVKQ | LELTDLLGT  | P-TPLQAKV  | RNEKARRFLG  | 285 |
| XP_002594335 | LCGS-FFTKYT  | PAIDVWSIGC  | IFAEVLRGKP  | LFPGKNVVKQ | LELTDLLGT  | P-HPDVNRV  | RNEKARRFLG  | 260 |
| XP_003058405 | LCGS-FFTKYT  | PAIDVWSIGC  | IFAEVLSGRP  | LFPGKNVVKQ | LELTDLLGT  | P-KPEITAKV | RNEKARRFLA  | 260 |
| XP_013900021 | LCGS-FFAKYS  | PSIDVWSIGC  | IFAEVLTGKP  | LFPGRNVVHQ | LELTDLLGT  | P-SPEITAKV | RNEKARRFLV  | 356 |
| XP_002954367 | LCGS-FFAKYS  | PAIDVWSIGC  | IFAEVLLGKP  | LFPGRNVVHQ | LELTDLLGT  | P-SGEVIAKV | RNEKARRFLV  | 262 |
| KXZ43541     | LCGS-FFAKYS  | PAIDVWSIGC  | IFAEVLLGKP  | LFPGRNVVHQ | LELTDLLGT  | P-SAEVIAKV | RNEKARRFLV  | 288 |
| XP_001694300 | LCGS-FFAKYS  | PAIDVWSIGC  | IFAEVLLGKP  | LFPGRNVVHQ | LELTDLLGT  | P-SPEVIAKV | RNEKARRFLV  | 261 |
| XP_005645479 | LCGS-FFAKYS  | TAIDVWSIGC  | IFAEVLLGKP  | LFPGRNVVHQ | LELTDLLGT  | P-SAEVIAKV | RNEKARRFLM  | 323 |
| XP_011399372 | LCGS-FFTKYT  | PAIDVWSIGC  | IFAEVLRGKP  | LFPGRNVVHQ | LELTDLLGT  | P-AQEVIAKV | RNEKARRFLV  | 252 |
| KDD74687     | LCGS-FFAKYS  | PAIDVWSIGC  | IFAEVLLGKP  | LFPGRNVVHQ | LELTDLLGT  | P-SPEVIAKV | RNEKARRFLV  | 283 |
| XP_005844785 | LCGS-FFAKYS  | PAIDVWSIGC  | IFAEVLLGKP  | LFPGRNVVHQ | LELTDLLGT  | P-SPEVIAKV | RNEKARRFLM  | 259 |
| KDD75646     | LLLS-CSDYIG  | PAIDVWSIGC  | IFAEVLRGKP  | LFPGKDYHQ  | LNLCKVIGT  | P-SAEEDSRV | ASDKARQYL   | 272 |
| XP_001419478 | LLLS-SEEYA   | ASIDVWSIGC  | IFAEVLRGKP  | LFPGKDFHQ  | MRLLETLS   | P-EEADMDFI | SSPYARKYA   | 330 |
| XP_003083155 | LLLS-SEEYA   | ASIDVWSIGC  | IFAEVLRGKP  | LFPGKDFHQ  | MRLLETLS   | P-EEADMDFI | SSPYARKYA   | 324 |
| CCO18034     | LLLS-CAEYIT  | VAIDVWSIGC  | IFAEVLRGKP  | LFPGKDYHQ  | LNLTKVIGT  | P-DEQDLYFV | TSDKARRYLR  | 417 |
| XP_001419851 | LLLS-CAEYIT  | SAIDVWSIGC  | IFAEVLRGKP  | LFPGKDYHQ  | LNLTKVIGT  | PQNDSELDI  | NNEKARRYLR  | 284 |
| XP_003081390 | LLLS-CAEYIT  | SAIDVWSIGC  | IFAEVLRGKP  | LFPGKDYHQ  | LNLTKVIGT  | PQNDSELDI  | NNEKARRYLR  | 344 |
| XP_002501054 | LLLS-CEDYIT  | SAIDVWSIGC  | IFAEVLRGKP  | LFPGKDYHQ  | MRLVEVLGS  | P-NEEDCAFI | QSTKARNYLR  | 251 |
| XP_003057263 | LLLS-CEDYIS  | ASIDVWSIGC  | IFAEVLRGKA  | LFPGKDYHQ  | MRLVEVLGS  | P-KVEDLVFI | QSQAAYLR    | 270 |
| XP_005651434 | LLLS-CFQYIT  | AAIDVWSIGC  | IFAEVLRGKP  | LFPGKDYDQ  | LKLKMLGS   | P-CSDLVFI  | SSSKARAYLR  | 277 |
| KDD76079     | LLLS-CEAYIT  | AGIDVWSIGC  | IFAEVLRGKP  | LFPGKDYDQ  | LKMLKVLGT  | P-SEEDLGF  | TAPKARTYLR  | 174 |
| XP_013893971 | LLLS-CDHYIT  | AAIDVWSIGC  | IFAEVLRGKP  | LFPGKDYDQ  | LKLKMLGS   | P-SEEDLGF  | TAPKARTYLR  | 288 |
| XP_001690850 | LLLS-CDTYIT  | TAIDVWSIGC  | IFAEVLRGKP  | LFPGKDYDQ  | LKLKMLGS   | P-SEEDLGF  | TAPKARTYLR  | 282 |
| XP_001690852 | LLLS-CEHYIT  | SAIDVWSIGC  | IFAEVLRGKP  | LFPGKDYDQ  | LKLKMLGS   | P-SEEDLGF  | TAPKARTYLR  | 289 |
| XP_002948304 | LLLS-CEYITN  | AAIDVWSIGC  | IFAEVLRGKP  | LFPGKDYDQ  | LKLKMLGS   | P-SEEDLGF  | TAPKARTYLR  | 289 |
| KXZ55952     | LLLS-CEHYIT  | AAIDVWSIGC  | IFAEVLRGKP  | LFPGKDYDQ  | LKLKMLGS   | P-SEEDLGF  | TAPKARTYLR  | 295 |
| XP_011398170 | LLLS-CDSYS   | AGIDVWSIGC  | IFAEVLRGKP  | LFPGKDYDQ  | LKLKMLGS   | P-SDEELGF  | TAPKARTYLR  | 278 |
| XP_005848327 | LLLS-CDSYD   | AGIDVWSIGC  | IFAEVLRGKP  | LFPGKDYDQ  | LKLKMLGS   | P-SDEELGF  | TAPKARTYLR  | 269 |
| XP_013902829 | LLLS-CPDYIT  | AAIDVWSIGC  | IFAEVLRGKP  | LFPGKDYVHQ | LNLTKVIGS  | P-GEEDLQFV | SSEKARRYLR  | 228 |
| XP_002955338 | LLLS-CSGYIT  | TAIDVWSIGC  | IFAEVLRGKP  | LFPGKDYVHQ | LSLTKVIGS  | P-SEEGEF   | TSEKARRYLR  | 303 |
| KXZ46360     | LLLS-CSGYIT  | TAIDVWSIGC  | IFAEVLRGKP  | LFPGKDYVHQ | LSLTKVIGS  | P-TEEELGF  | TSEKARRYLR  | 299 |
| XP_001700291 | LLLS-CSGYIT  | TAIDVWSIGC  | IFAEVLRGKP  | LFPGKDYVHQ | LSLTKVIGS  | P-TEEELGF  | TSEKARRYLR  | 298 |
| XP_002503699 | LLLS-CSEYIT  | SAIDVWSIGC  | IFAEVLRGKP  | LFPGKDYVHQ | LNLTKVIGS  | P-SEEEEMFI | TSDKARRYLR  | 293 |
| XP_003059282 | LLLS-CAEYIT  | AAIDVWSIGC  | IFAEVLRGKP  | LFPGKDYVHQ | LNLTKVIGS  | P-SESEMAFI | SSDKARRYLR  | 296 |

Consensus LLLS-CTKYT XAIDXWSVGC IFAELLGKGP LFPGKDYVHQ LELITDLLGT P-SEEDLAFI RSEKARRYLR

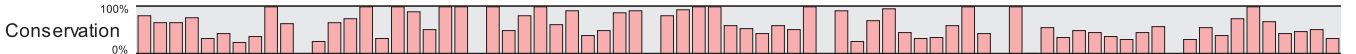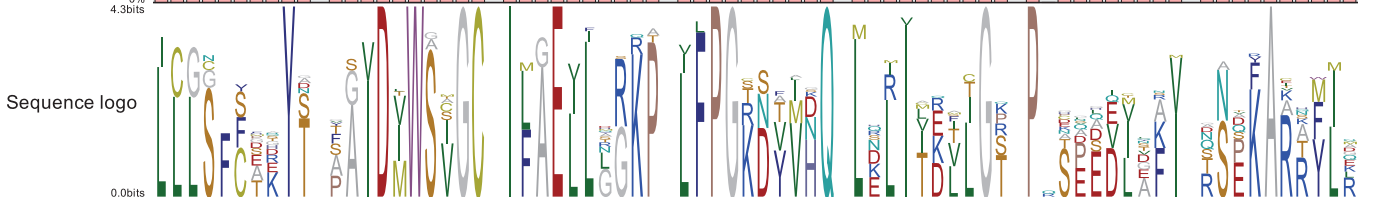



|              | 500          |             | 520        |            | 540         |             | 560                |
|--------------|--------------|-------------|------------|------------|-------------|-------------|--------------------|
| KDD76312     | SMRAPE - APR | LEVAFPDAPP  | DARDLSKLL  | AFNPDRRISA | EEALRHPYCA  | QFRGAEDPEV  | A-PCALA --- 323    |
| XP_011396366 | SMRAPD - TPR | LEAAFPSASP  | EADLLEKLL  | QFNPEKRISA | EEALRHPYCL  | PFHNLVDEPV  | A-PNTIT --- 168    |
| XP_005846540 | SMRAPP - TPR | LEATFPSASP  | EADLQRL    | HFNPDKRISP | EEALRHPYCA  | QFHNPHDEPV  | A-PATIT --- 333    |
| XP_002507666 | SLPPPK - PPK | ATELFPRASH  | QAADLQKLL  | QFNPEKRITA | EEALRHPYLA  | QFHNPADEPY  | C-DHRL --- 320     |
| XP_003056520 | SLPCTS - SNT | TRELPNTSE   | HAFDLHKLL  | DINPKRITA  | DAAALRHPYS  | QFHNPADEPS  | C-NHVIS --- 320    |
| XP_005646693 | ALPCGD - APA | HLRFPSASP   | EAADLSRLL  | QFNPAKRITA | EEALRHPYVA  | QFHSSADEPS  | A-PGILT --- 323    |
| KXZ50454     | SCSVYG - GRR | GAELLPNASP  | EADLLEKLL  | -----SA    | EEALRHPYVA  | QFHNPADEPV  | C-HRILV --- 312    |
| XP_001699095 | SCSVYQ - ARR | QDVFPHASP   | EADLLEKLL  | VFNPHKRLTA | EQAALRHPYVA | QFHNPADEPV  | C-NRILV --- 321    |
| XP_002951120 | SCTVTA - SRR | ADTFPNASP   | EAADLRKLL  | VFNPHKRLTA | EQAALRHPYVA | QFHNMADEPV  | C-NRILV --- 321    |
| KXZ56454     | DPEKR - PKN  | LATVFPKADP  | RADLLEKLL  | ALDPKDRPTP | AAAALRHPYFA | ELPSAQQDR   | V-PVPE --- 317     |
| XP_001703601 | ALPEKR - PRQ | LSSKFPAADP  | LADLLEKLL  | AFDPADRPTA | EEALRHPYFA  | GPSANQVFR   | GQPSVRAADD --- 321 |
| XP_002954138 | NMPHKE - PPK | LSSKFPNADP  | LADLLEKLL  | AFDPADRPTA | EEALRHPYFA  | GPEVROETV   | -PVAA --- 313      |
| XP_001419059 | NMRKIP - AVP | SEKFPGVDP   | KALNLSKLL  | AFDPDRPTA  | AQAALRHPYFD | GADSRPEPA   | RRPKKDE --- 328    |
| XP_003080614 | QMRKIP - ATP | LSEKFPVDS   | KALNLEKLL  | AFDPDRPTA  | AQAALRHPYFE | GADVSREPS   | RHPLPKSV --- 343   |
| CCO16213     | TMRVKP - KAI | LKQKFPKASE  | KALKLSRLL  | AFDPERPNA  | TEALRHPYFE  | GADPSREPT   | ARPKVED --- 352    |
| XP_002505335 | NMRVKP - RTP | FASRFPGAAP  | AAALLEKLL  | AFDPERPTA  | EEALRHPYFA  | GSDPSREPA   | AEIVSRTE --- 327   |
| XP_003058405 | NMRVKP - KIP | SQRFPKAAAP  | GALALDKLL  | AFDPERPTA  | EEALRHPYFA  | NADPAREPA   | AEIVSRDE --- 327   |
| XP_013900021 | NMRKKA - GVP | FEERFPRADP  | RARALLRLL  | AFDPADRPTA | EEALRHPYFS  | NHSPAREPS   | AAAISKLA --- 423   |
| XP_002954367 | NMCKP - GIP  | FEHLFPRADR  | GARLLRLL   | AFDPAERPTA | EEALRHPYFT  | GHCAREPV    | AQPSKMA --- 329    |
| KXZ43541     | GMRPKP - GIP | FEQHFRADR   | GARLLRLL   | AFDPAERPTA | EEALRHPYFA  | GHCAREPV    | AAPISKMA --- 355   |
| XP_001694300 | NMRPKP - GIP | FEQHFRADR   | GARLLRLL   | AFDPAERPTA | EEALRHPYFA  | GHCAREPV    | AQPSKLA --- 328    |
| XP_005645479 | NMRKKP - GVN | LEQYFPRADR  | GARLLKRM   | AFDPAERPSS | EEALRHPYFA  | GQPGREPS    | AQPSKLS --- 390    |
| XP_011399372 | NMRKKP - GTS | FEAYFPKADK  | GALKRLL    | AFDPAERPTS | EEALRHPYFH  | GSDPSREPS   | AQPSKLA --- 319    |
| KDD74687     | NMRKKP - GVP | FEQYFPKADK  | GARLLHRL   | AFDPSERPTA | EEALRHPYFQ  | GSDPSREPS   | AQPSKLA --- 350    |
| XP_005844785 | NMRKKP - GIP | FEQYFPKADK  | GARLLWRLL  | AFDPAERPTA | EEALRHPYFA  | GSDPSREPS   | AQPSKLA --- 326    |
| KDD75646     | SMPFMP - RAN | LQSFPGANP   | LADMELKLL  | IFDSSARLDI | RGAALRHPYLA | SLHEPADEPE  | C-RQPF --- 337     |
| XP_001419478 | SLPRKP - KVD | FALVYPDANP  | LADLERL    | VFDPQRISV  | DDAALRHPYLA | SLHDASMEPT  | YTPAAD --- 396     |
| XP_003083155 | ALPRKP - KID | FASYPRANV   | LAVLLERL   | VFNPHRRISV | DEAALRHPYLA | SLHDVSAEPR  | YAADPSD --- 390    |
| CCO18034     | QLPYSK - PMD | FKRLYPEANP  | LACDLEKML  | IFNPEKRINV | EECALRHPYLA | SLHDVNDPEV  | A-NAPFT --- 482    |
| XP_001419851 | SLPVT - RCS  | FQKLFNASP   | KAVDLDKML  | VLDPARRITV | EECALRHPYLE | SLHDEVDPEV  | A-ESPFT --- 349    |
| XP_003081390 | SLPVT - RCN  | FRKLFNASP   | KAVDLDKML  | VLDPARRITV | EECALRHPYLE | SLHDEVDPEV  | A-ETPFT --- 409    |
| XP_002501054 | TLPHSP - QVR | WERMFPKGNP  | QAVDLDKML  | QFDPKKRITV | EQAALRHPYLT | ALHDPMEPEPA | SEPAPFE --- 317    |
| XP_003057263 | SLPYS - PAR  | FDTMVDPANP  | DAVDLYKML  | EFNPKKRITV | EQAALRHPYLA | NLHDPSEPEPA | SEPAPFE --- 336    |
| XP_005651434 | ALPYAQ - RCP | FRVMFPDASH  | LADLMEKML  | QFNPERRISV | EQAALRHPYLA | QMHDPASELS  | A-PDTFD --- 342    |
| KDD76079     | SLPAAP - PAD | LRALEPEASAP | QAVDLDKML  | QFDPRRRISV | AGAALRHPYLA | SLHDPAEPT   | A-KATFC --- 239    |
| XP_013893971 | ALPAVE - GNT | SASGPPPRP   | -----      | -----      | -----WPA    | G           | ----- 314          |
| XP_001690850 | ALPPSE - KIN | FRKLFDPADP  | LADLMEKML  | QFDPKRKIDV | LQAALRHPYLA | QLHEEAAEPA  | A-AGEFV --- 347    |
| XP_001690852 | ALPPAE - KVN | FRKLFPEADP  | LADLMEKML  | QFDPKRKIDV | HQAALRHPYLA | QLHDEAAEPA  | A-PGEFV --- 354    |
| XP_002948304 | ALPPSE - KVN | FRKLFPEADP  | LADLMEKML  | QFDPKRKIDV | HQAALRHPYLA | QLHDEAAEPC  | A-PGEFV --- 354    |
| KXZ55952     | ALPPSE - KVN | FRKLFPEADP  | LADLMEKML  | QFDPKRKIDV | HQAALRHPYLA | QLHDEAAEPC  | A-PGEFV --- 360    |
| XP_011398170 | GAAVQ - KPD  | FRASFPDASK  | QAVDLMERML | QFDPRRRISV | DDAALRHPYLA | ALHDEAAEPA  | A-RGAFK --- 343    |
| XP_005848327 | ALAQVE - RTD | AKLFPGASP   | LAVDLGRML  | VFDPRRRITV | QQAALRHPYLA | QLHDEAAEPA  | A-AGVFK --- 334    |
| XP_013902829 | SLPRCP - RAD | FQELWPDADP  | QAVDLSRML  | VFDPSRRISV | DDAALRHPYLA | ALHDEAAEPA  | A-DAPFT --- 293    |
| XP_002955338 | SLPRSV - RVD | FAQLWPHANK  | QAVDLDKML  | VFDPTKRITV | EQAALRHPYLA | SLHDVDEPV   | C-ATPFT --- 368    |
| KXZ46360     | SLPRSE - RVD | FAQLWPNVNK  | PALDLDKML  | VFDPTKRITV | EQAALRHPYLA | SLHDVDEPV   | C-PNPFT --- 364    |
| XP_001700291 | SLPRSE - RVD | FQQLWPHANK  | TAVDLDKML  | VFDPTKRITV | EQAALRHPYLA | SLHDVDEPV   | C-PTPFT --- 363    |
| XP_002503699 | SLPRT - RVD  | FQKLYPEAEP  | QAVDLDKML  | VFDPASRITV | EEALRHPYLA  | SLHDVDEPS   | A-SGPF --- 358     |
| XP_003059282 | SLPVS - RVD  | FAKLYPDADP  | SADVLDKML  | AFDPSNRITV | EEALRHPYLA  | SLHDVDEPS   | A-SEPF --- 361     |

Consensus SLPXKP - RVD FEQLFPDADP LALDLEKLL AFDPAKRITX EEALRHPYLA XLHDPADPEV A-PGPFT ---

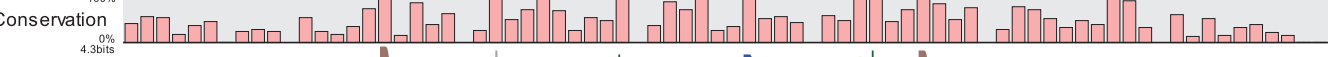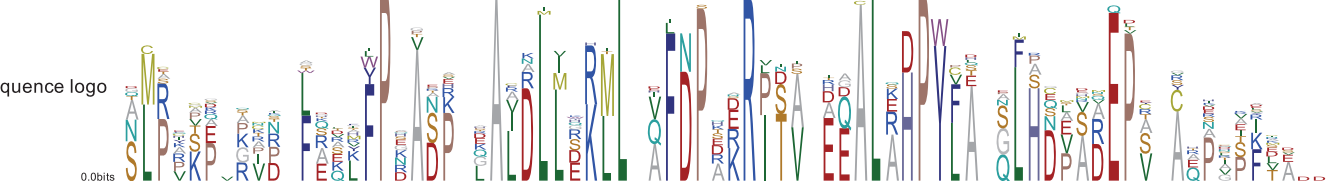

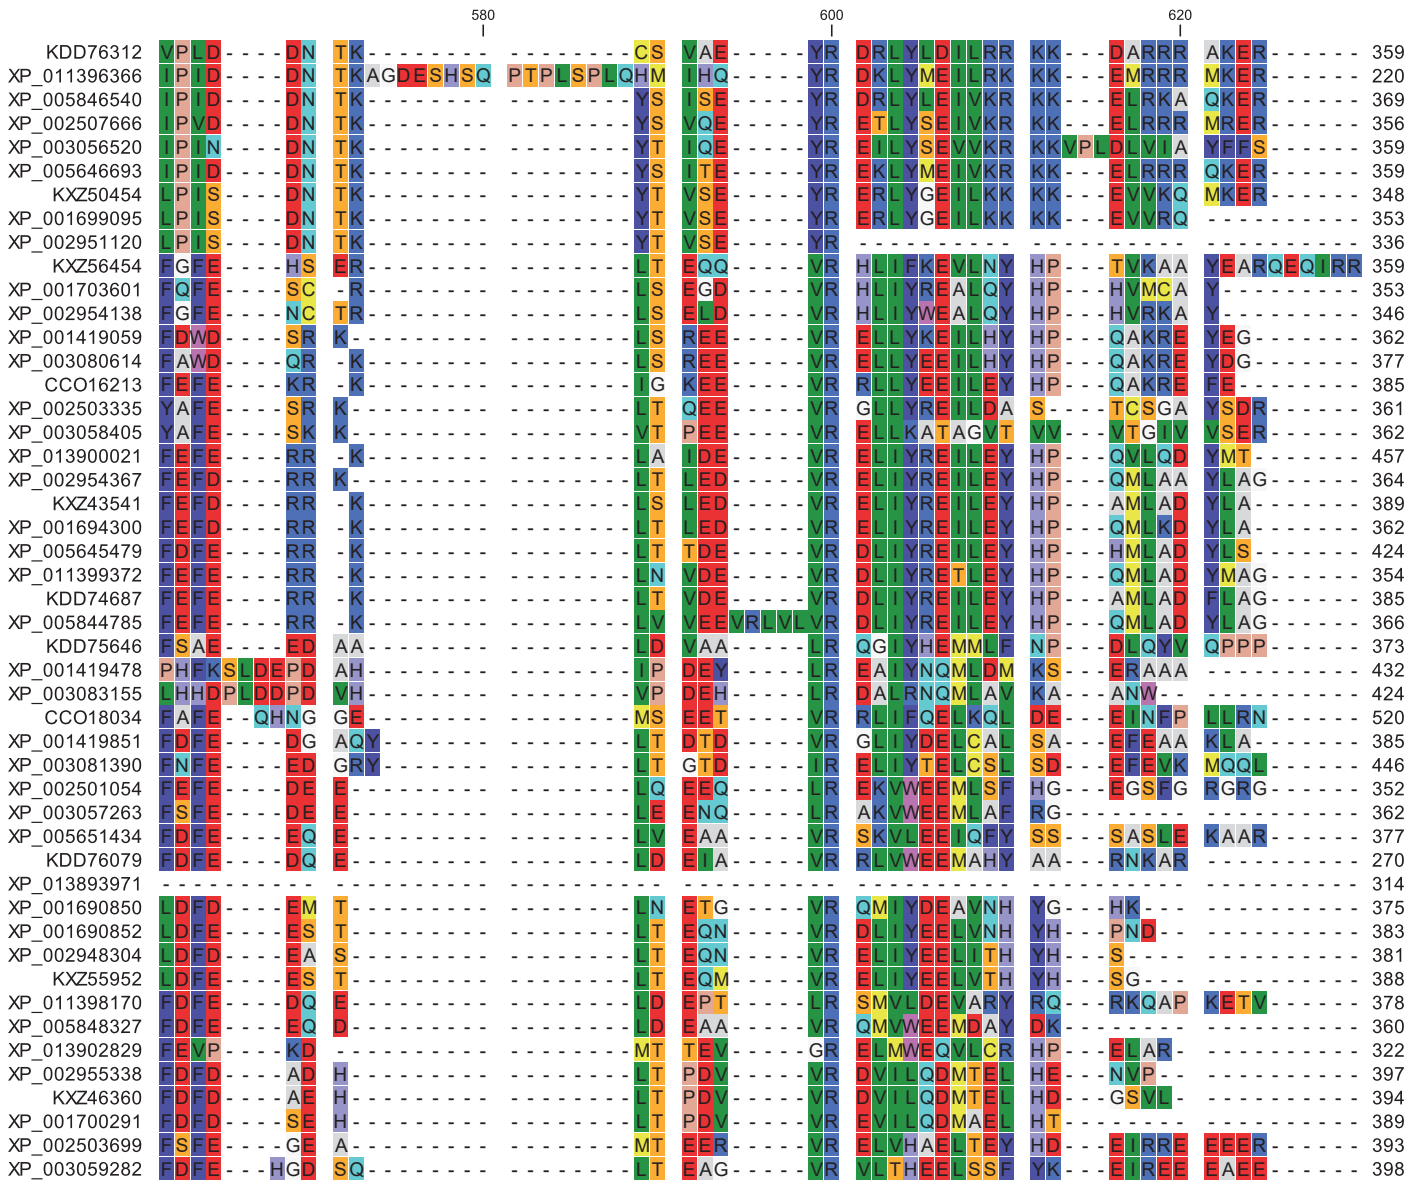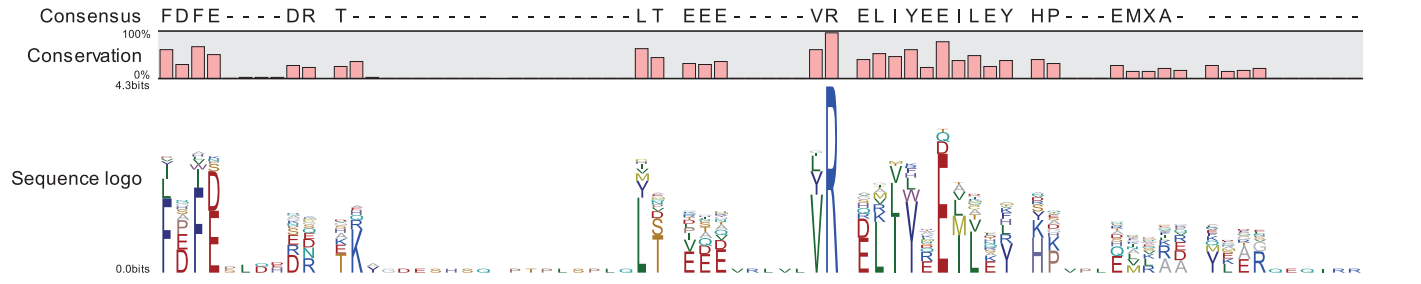

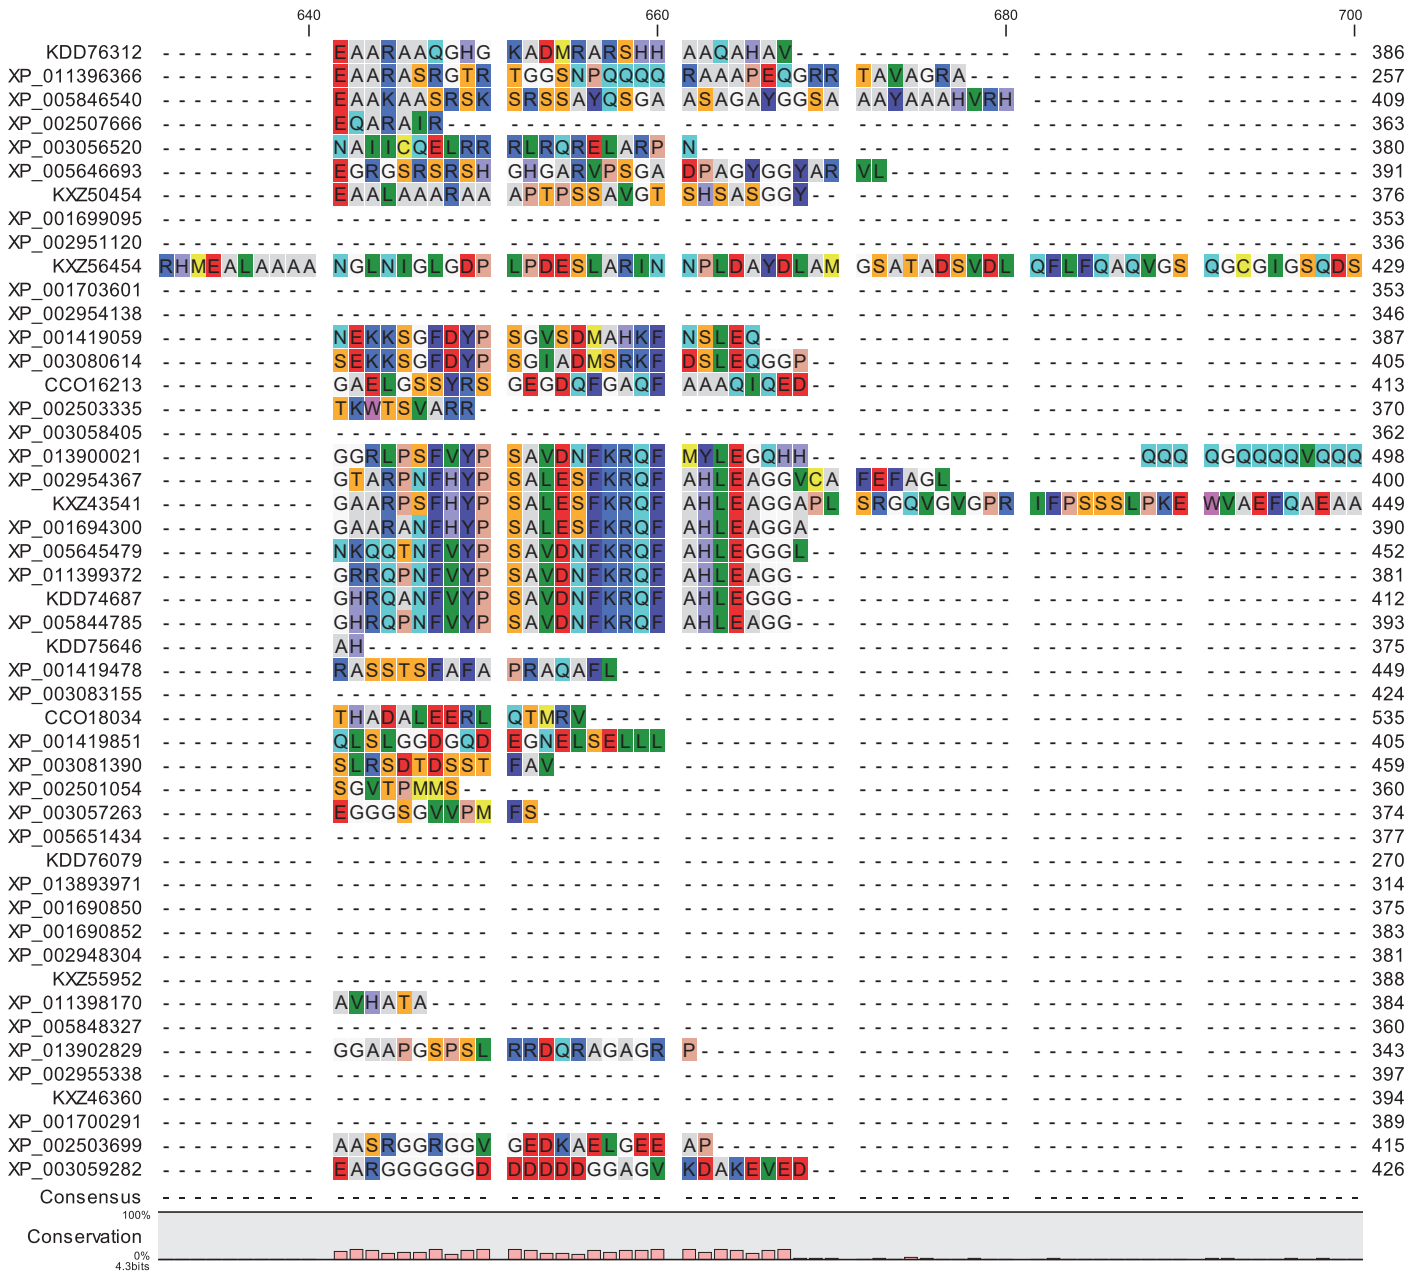

Sequence logo

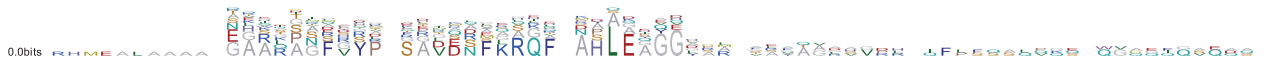

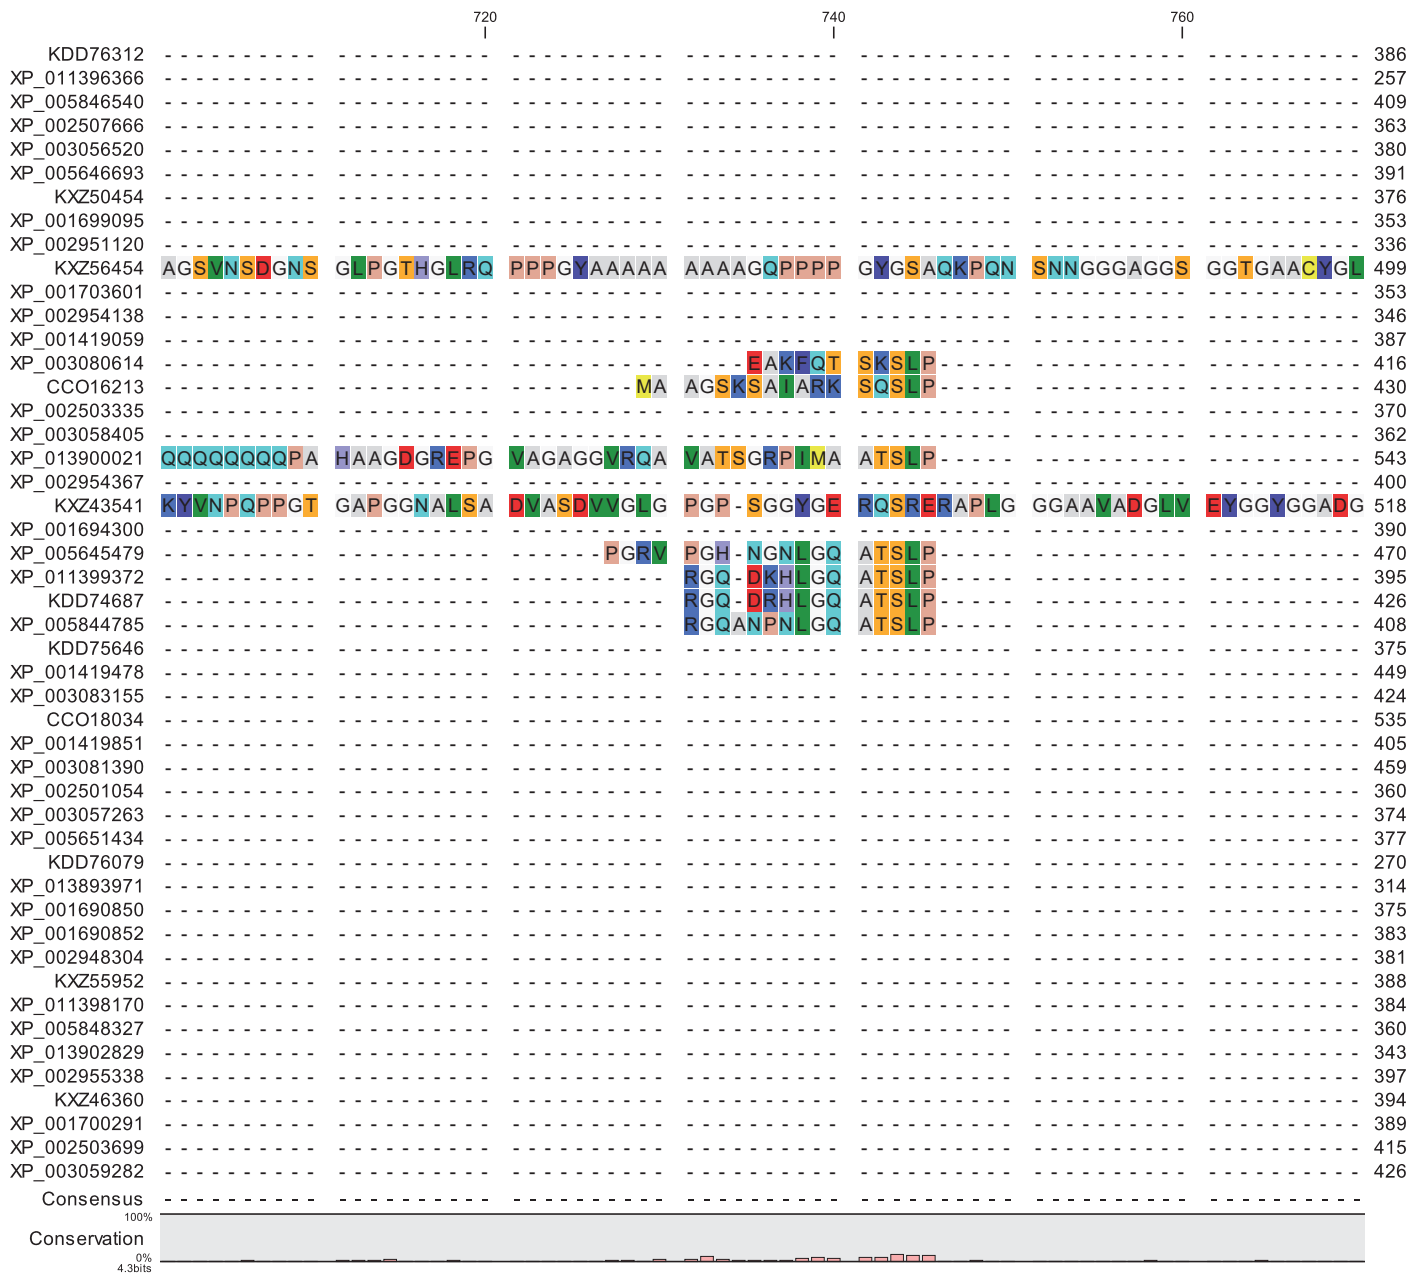

Sequence logo

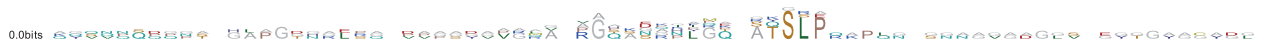

|              | 780        | 800           | 820          | 840        |             |              |            |            |     |
|--------------|------------|---------------|--------------|------------|-------------|--------------|------------|------------|-----|
| KDD76312     | -----      | -----         | -----        | -----      | 386         |              |            |            |     |
| XP_011396366 | -----      | -----         | -----        | -----      | 257         |              |            |            |     |
| XP_005846540 | -----      | -----         | -----        | -----      | 409         |              |            |            |     |
| XP_002507666 | -----      | -----         | -----        | -----      | 363         |              |            |            |     |
| XP_003056520 | -----      | -----         | -----        | -----      | 380         |              |            |            |     |
| XP_005646693 | -----      | -----         | -----        | -----      | 391         |              |            |            |     |
| KXZ50454     | -----      | HQ SGGASQGAGH | SNHTSASGGY   | RITNENSAPT | TNAAARRKSV  | ENGVAAGAAA   | 428        |            |     |
| XP_001699095 | -----      | -----         | -----        | -----      | -----       | -----        | 353        |            |     |
| XP_002951120 | -----      | -----         | -----        | -----      | -----       | -----        | 336        |            |     |
| KXZ56454     | AAAGYAPPPS | AVAIQQSGYS    | AAAAAAAAAAAY | GAAAAGYGAP | PHAMIGMGYY  | PPPPQAMAQP   | GSFSPMDPPP | 569        |     |
| XP_001703601 | -----      | -----         | -----        | -----      | -----       | -----        | 353        |            |     |
| XP_002954138 | -----      | -----         | -----        | -----      | -----       | -----        | 346        |            |     |
| XP_001419059 | -----      | -----         | -----        | -----      | -----       | -----        | 387        |            |     |
| XP_003080614 | -----      | KHAGVEYR      | DKAAQFAGGL   | DALSRSDSVK | PGGSPGLARM  | DSDDVEYEEL   | QTDDVDRFD  | 473        |     |
| CCO16213     | -----      | REKMNAYV      | KNAEELYGER   | VKRQAAEQVY | REKVNSEFS   | EGFSLNGSPS   | QDDISFEKEK | 488        |     |
| XP_002503335 | -----      | -----         | -----        | -----      | -----       | -----        | 370        |            |     |
| XP_003058405 | -----      | -----         | -----        | -----      | -----       | -----        | 362        |            |     |
| XP_013900021 | -----      | RERAFEFQ      | AEAAKYS      | -----      | HLLPANA     | AAAAAAAAAAAA | AAAAQQQQQL | HQLQQQQQQG | 595 |
| XP_002954367 | -----      | GEGERGK       | GEKGGWGGK    | RAGGRFTTG  | EWRAERLKR   | GGDKGGRVHE   | GRKSGEEDG  | 458        |     |
| KXZ43541     | LDLEEEEQVE | RQRRLRSGH     | GAAAHCDPAH   | GHHHHHGGM  | GPSAAAAAAAA | QAQQQQR      | IAA        | AAQLVAAQQR | 588 |
| XP_001694300 | -----      | -----         | GAA          | -----      | -----       | -----        | -----      | 395        |     |
| XP_005645479 | -----      | RERYKDFQ      | TEAQRVY      | -----      | PQWDRQ      | GARA         | -----      | 496        |     |
| XP_011399372 | -----      | RERVDFQ       | SEAAKYM      | S          | RGHHMSGVY   | GATVGAAP     | -----      | 430        |     |
| KDD74687     | -----      | RERVREFQ      | SEAAKYY      | H          | RGHHMSGVY   | GAMVGSVA     | -----      | 461        |     |
| XP_005844785 | -----      | RERVSEFR      | SEAAKYLAAQ   | -----      | RGTHMSGVY   | GATVGSQPG    | GAGGAGLGP  | YAAQPPPPGG | 466 |
| KDD75646     | -----      | -----         | -----        | -----      | -----       | -----        | -----      | 375        |     |
| XP_001419478 | -----      | -----         | -----        | -----      | -----       | -----        | -----      | 449        |     |
| XP_003083155 | -----      | -----         | -----        | -----      | -----       | -----        | -----      | 424        |     |
| CCO18034     | -----      | -----         | -----        | -----      | -----       | -----        | -----      | 535        |     |
| XP_001419851 | -----      | -----         | -----        | -----      | -----       | -----        | -----      | 405        |     |
| XP_003081390 | -----      | -----         | -----        | -----      | -----       | -----        | -----      | 459        |     |
| XP_002501054 | -----      | -----         | -----        | -----      | -----       | -----        | -----      | 360        |     |
| XP_003057263 | -----      | -----         | -----        | -----      | -----       | -----        | -----      | 374        |     |
| XP_005651434 | -----      | -----         | -----        | -----      | -----       | -----        | -----      | 377        |     |
| KDD76079     | -----      | -----         | -----        | -----      | -----       | -----        | -----      | 270        |     |
| XP_013893971 | -----      | -----         | -----        | -----      | -----       | -----        | -----      | 314        |     |
| XP_001690850 | -----      | -----         | -----        | -----      | -----       | -----        | -----      | 375        |     |
| XP_001690852 | -----      | -----         | -----        | -----      | -----       | -----        | -----      | 383        |     |
| XP_002948304 | -----      | -----         | -----        | -----      | -----       | -----        | -----      | 381        |     |
| KXZ55952     | -----      | -----         | -----        | -----      | -----       | -----        | -----      | 388        |     |
| XP_011398170 | -----      | -----         | -----        | -----      | -----       | -----        | -----      | 384        |     |
| XP_005848327 | -----      | -----         | -----        | -----      | -----       | -----        | -----      | 360        |     |
| XP_013902829 | -----      | -----         | -----        | -----      | -----       | -----        | -----      | 343        |     |
| XP_002955338 | -----      | -----         | -----        | -----      | -----       | -----        | -----      | 397        |     |
| KXZ46360     | -----      | -----         | -----        | -----      | -----       | -----        | -----      | 394        |     |
| XP_001700291 | -----      | -----         | -----        | -----      | -----       | -----        | -----      | 389        |     |
| XP_002503699 | -----      | -----         | -----        | -----      | -----       | -----        | -----      | 415        |     |
| XP_003059282 | -----      | -----         | -----        | -----      | -----       | -----        | -----      | 426        |     |

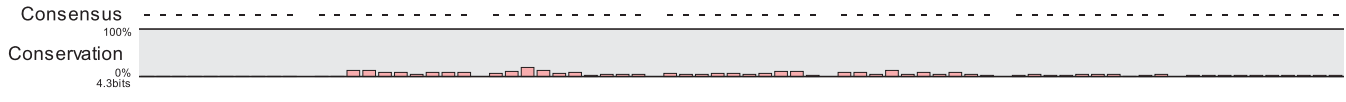

Sequence logo

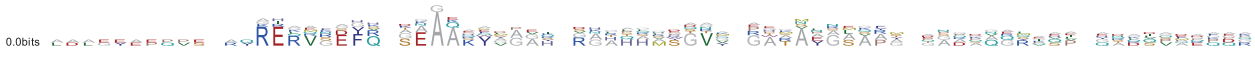

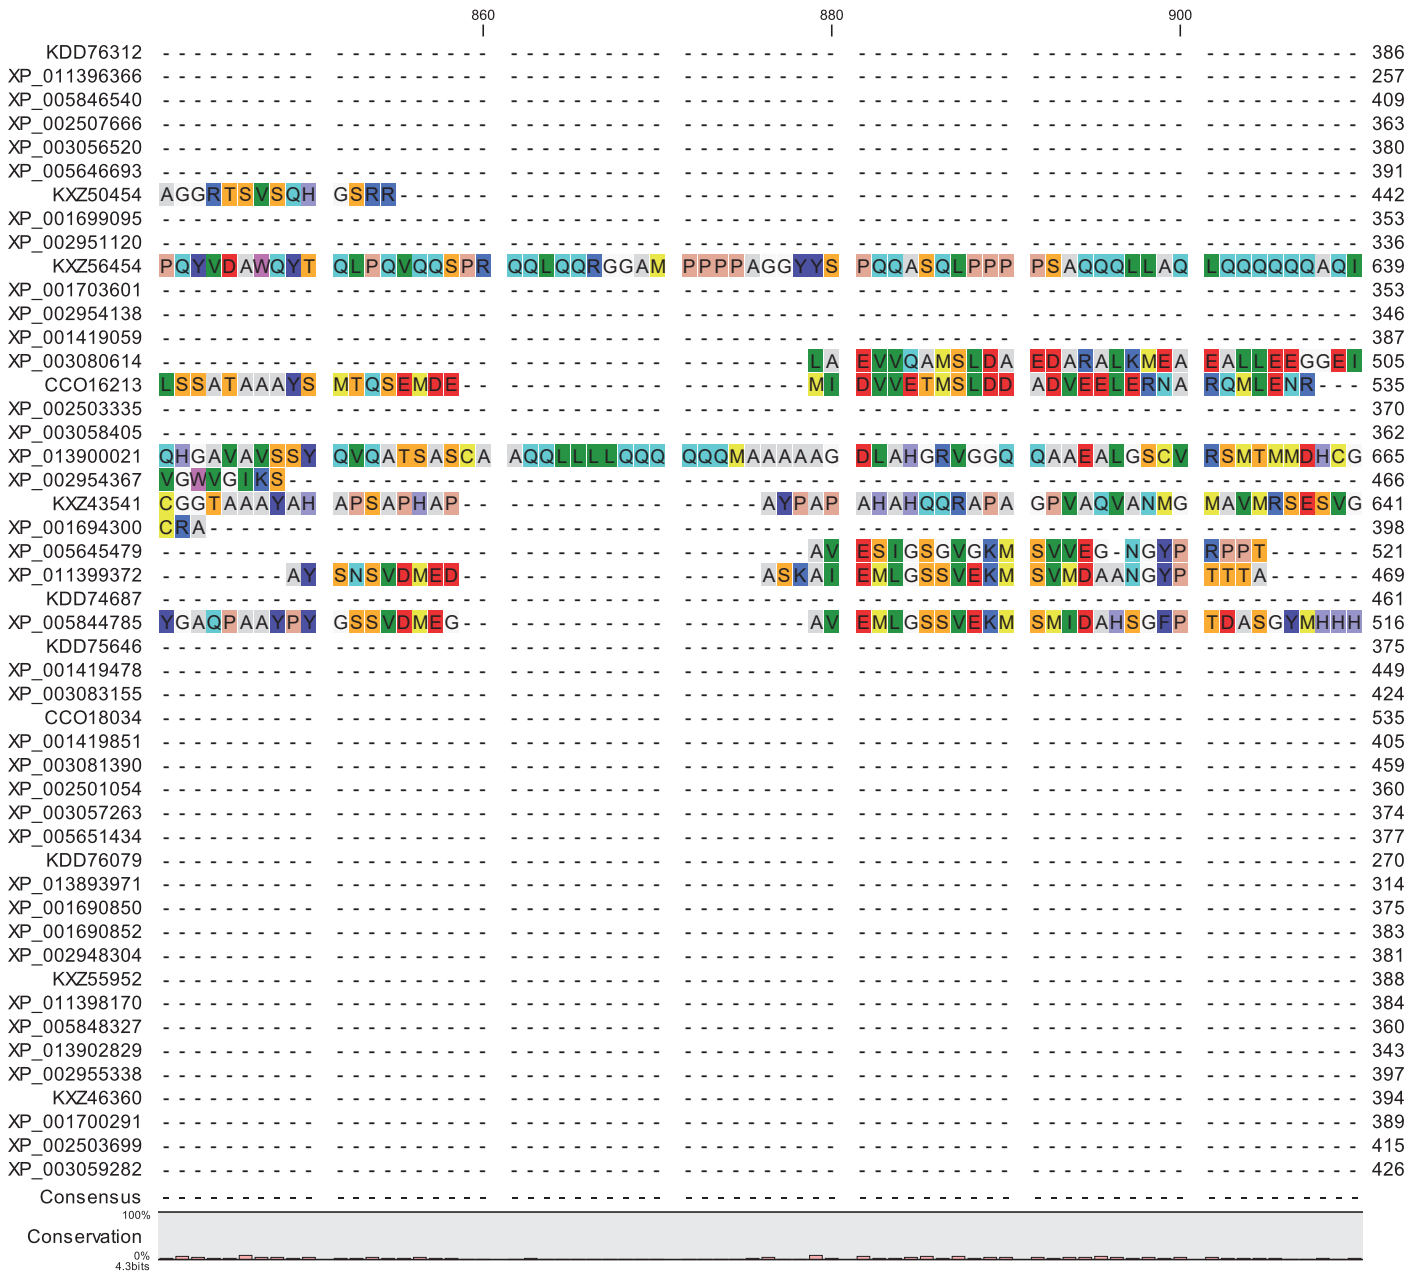

Sequence logo

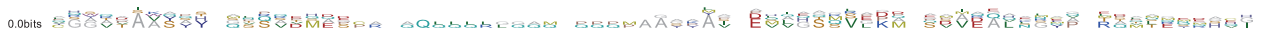

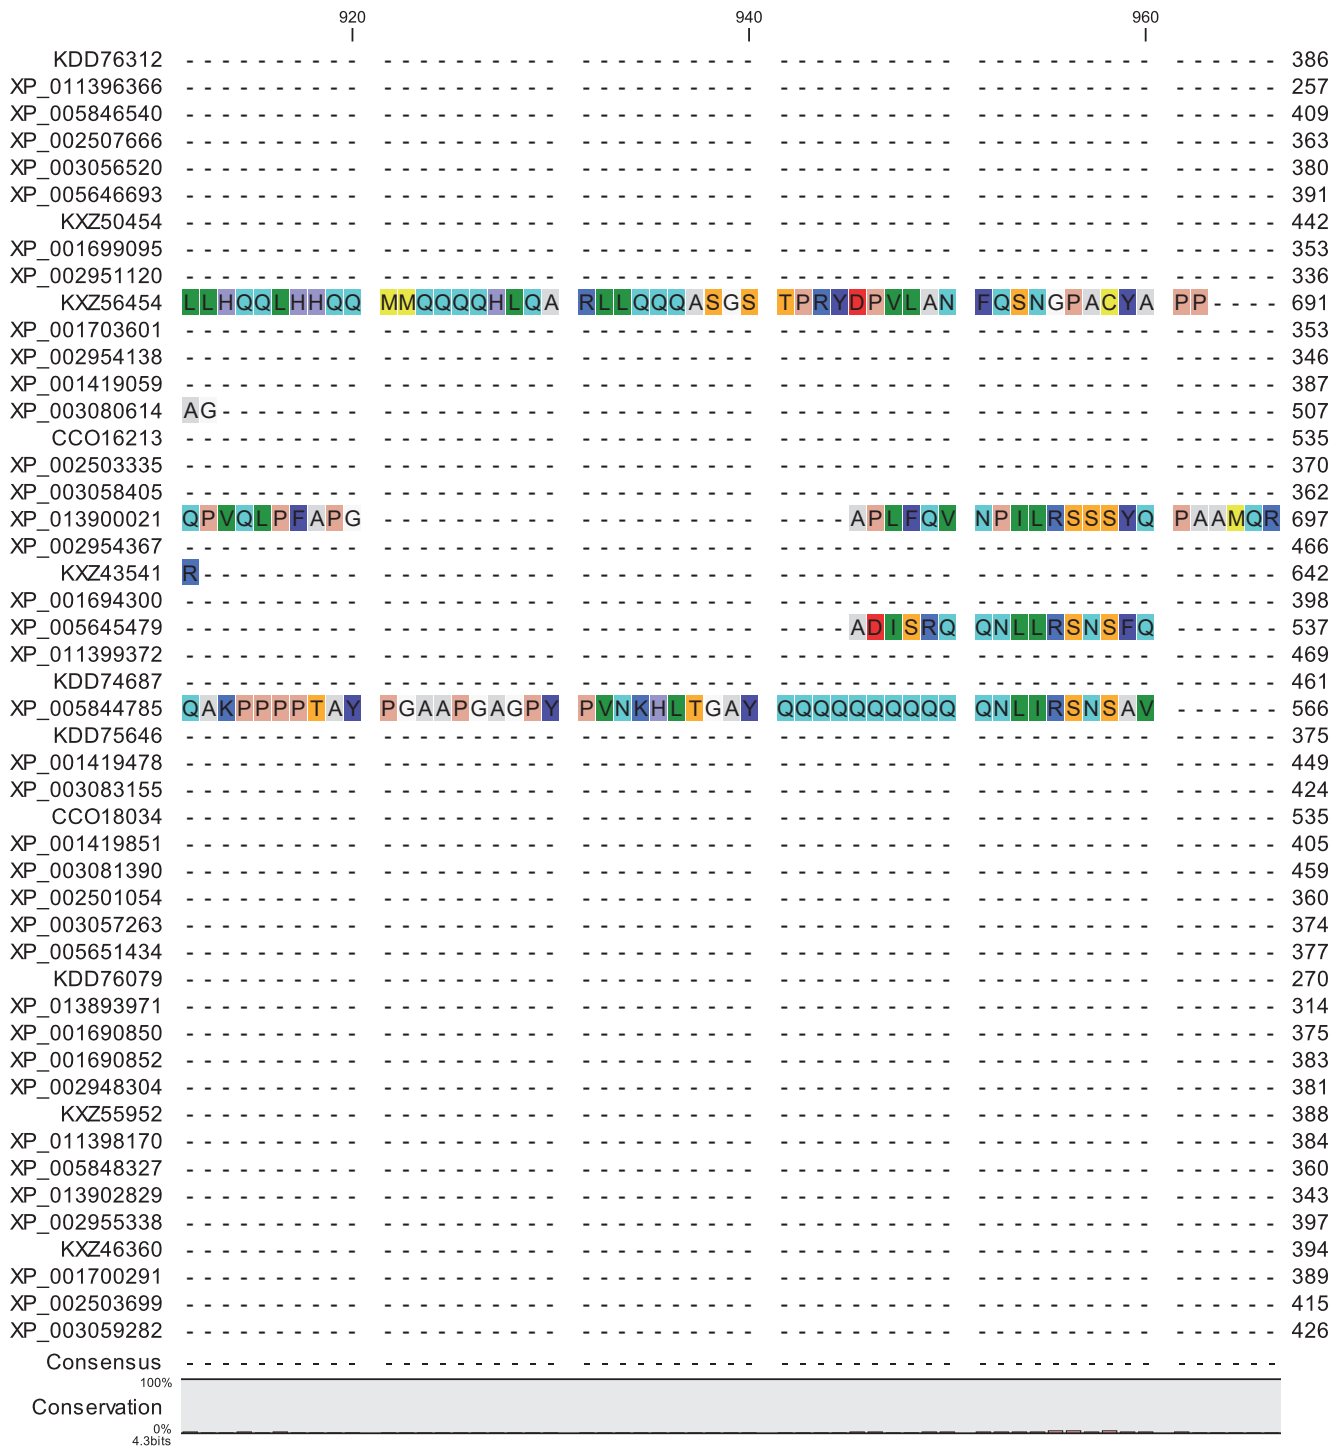

Sequence logo

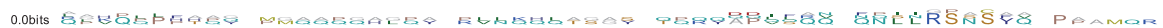

**Figure S1**  
**Multiple alignment of MAPK protein sequences from 13 algal species.** 48 sequences identified in 13 species (Table 2) were aligned by the MUSCLE alignment method. Amino acids are coloured according to their biochemical properties to visualise conservation and similarities. Consensus and degree of conservation are indicated below each block.

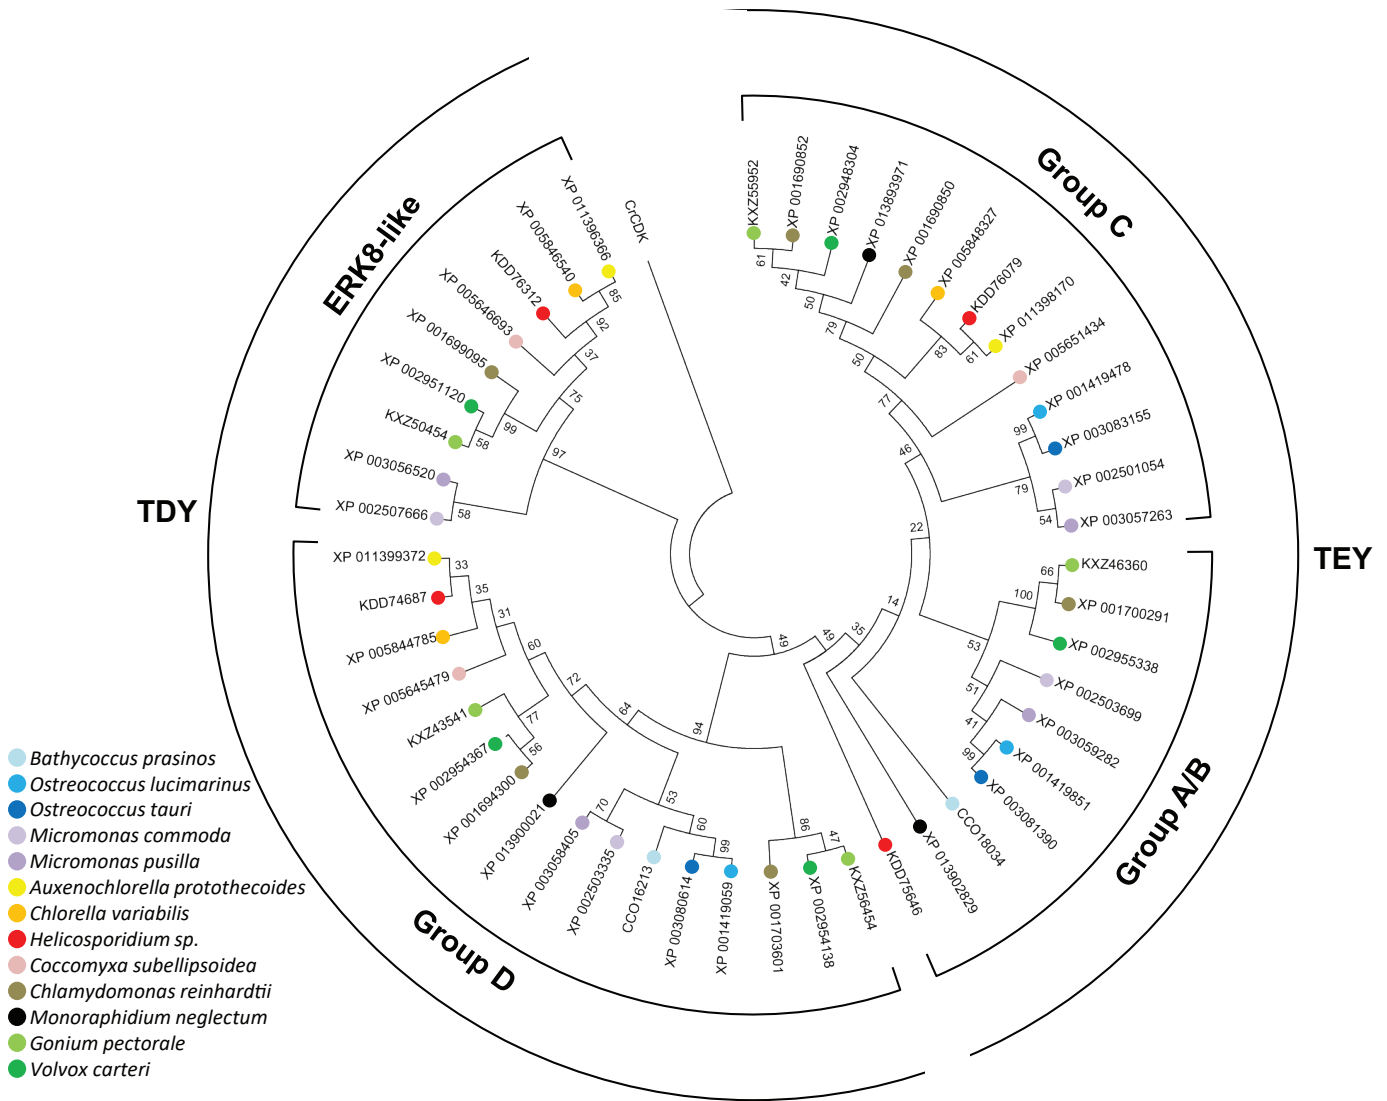

**Figure S2**

**Phylogenetic relationships of MAPK protein sequences in 13 algal species.** Full-length amino acid sequences of the 48 identified MAPKs (Table 2) were aligned by the MUSCLE alignment method and the phylogenetic tree was constructed by the Maximum-likelihood method using the MEGA6 software package. A cyclin-dependent kinase (CDKG1) of *Chlamydomonas reinhardtii* was used as outgroup. Species are indicated by the protein IDs in the tree with coloured dots according to the key on the left. Phylogenetic grouping and the type of the conserved phosphorylation site (TxY) are indicated at the inner and outer perimeters, respectively.



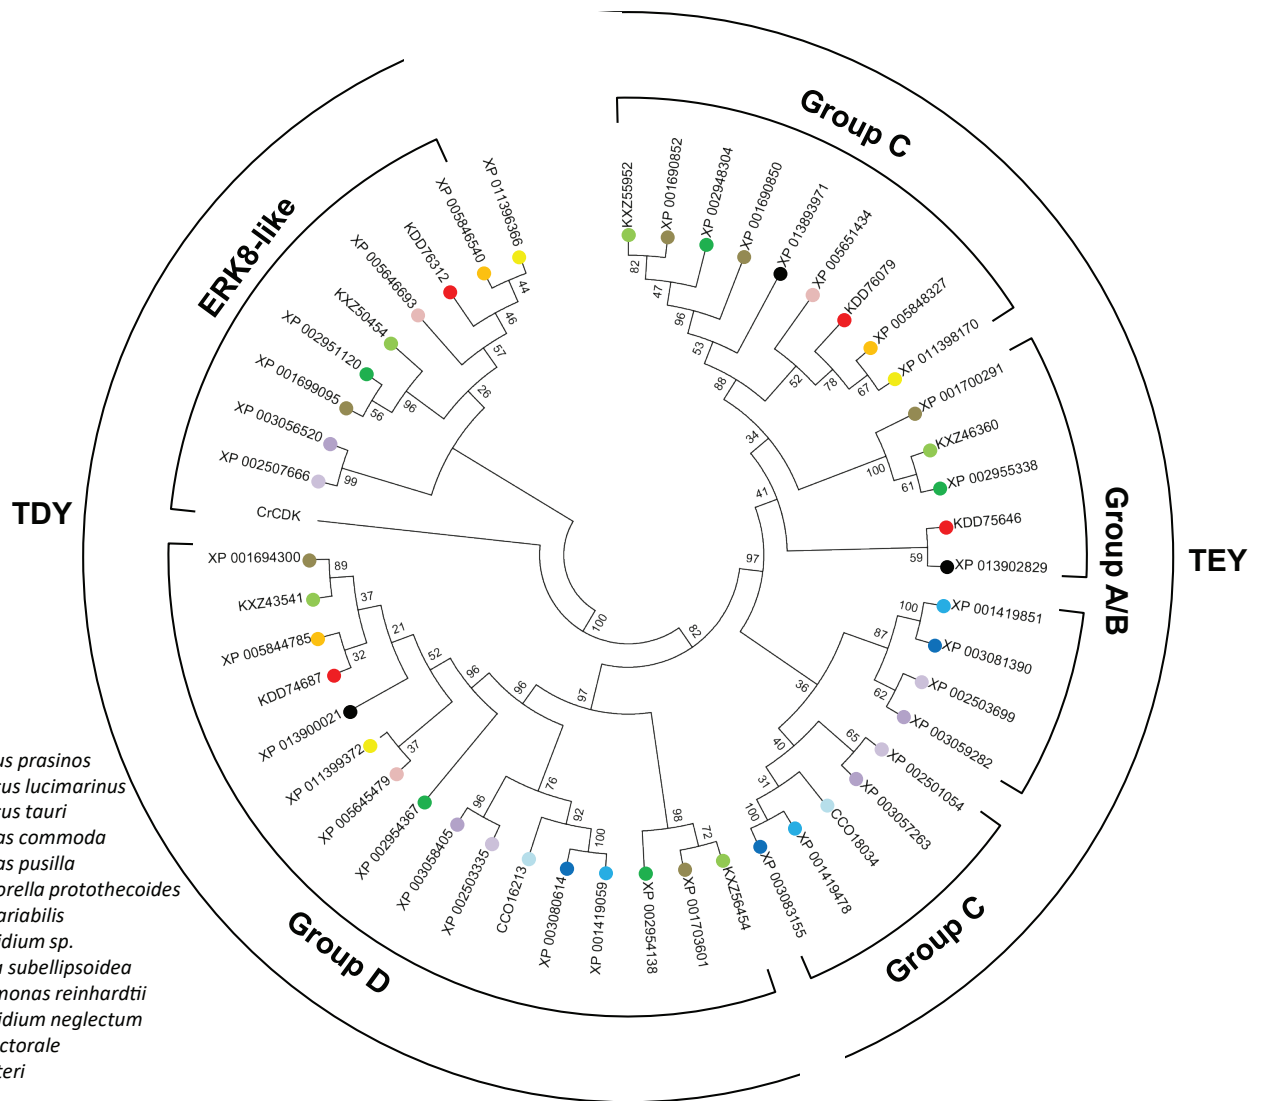

**Figure S3**

**Phylogenetic relationships of MAPK nucleotide sequences in 13 algal species.** Full-length nucleotide sequences of the 48 identified MAPKs (Table 2) were aligned by the MUSCLE alignment method and the phylogenetic tree was constructed by the Maximum-likelihood method using the MEGA6 software package. A cyclin-dependent kinase (CDKG1) of *Chlamydomonas reinhardtii* was used as outgroup. Species are indicated by the protein IDs in the tree with coloured dots according to the key on the left. Phylogenetic grouping and the type of the conserved phosphorylation site (TxY) are indicated at the inner and outer perimeters, respectively.

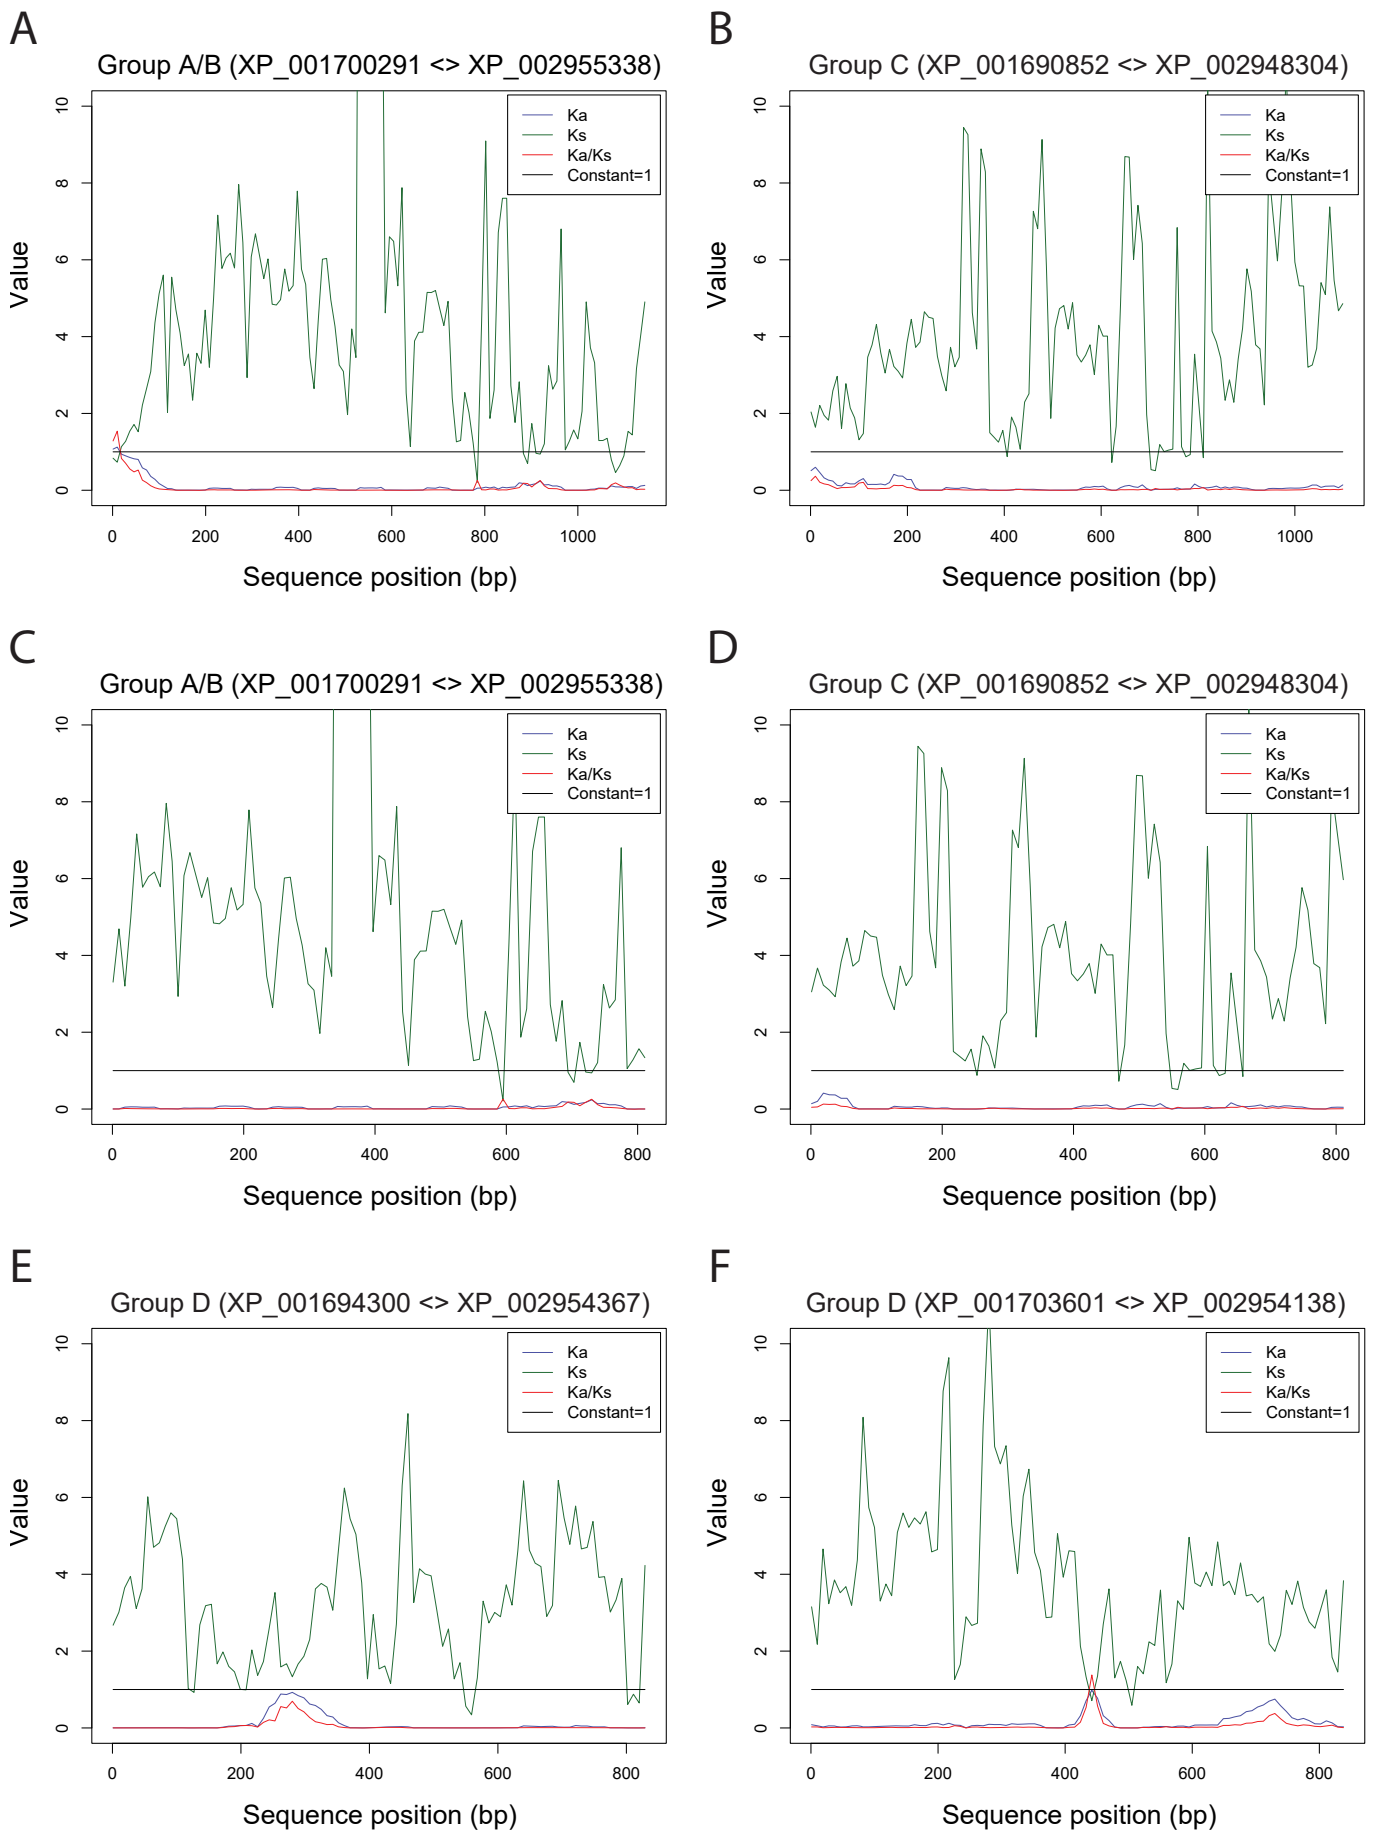

**Figure S4**

**Sliding window analysis of sequence divergence between MAPKs in *C. reinhardtii* and *V. carteri*.**

Full-length (A-B) and kinase domain encoding (C-F) nucleotide sequences of the indicated orthologous MAPKs were used at 51-bp window size and 9-bp step size settings for sliding window analysis. The Ka/Ks plots are indicated by red lines.



## Table S1

**Ka/Ks values of the 48 full-length MAPK sequences.** Ka/Ks values were calculated for all pairwise combinations of the 48 algal MAPK nucleotide sequences by generating 1175 pairwise alignments using the MUSCLE method of the MEGA6 software package. AXT format files were subsequently prepared using a self-made script. Ka/Ks values were calculated with the KaKs\_Calculator2.0 software using the Model Average (MA) method. Ka/Ks values below 1.0 indicate purifying selection.



## Table S2

**Ka/Ks values of the 48 MAPK kinase domain sequences.** Ka/Ks values were calculated for all pairwise combinations of the 48 algal MAPK kinase domain encoding nucleotide sequences by generating 1175 pairwise alignments using the MUSCLE method of the MEGA6 software package. AXT format files were subsequently prepared using a self-made script. Ka/Ks values were calculated with the KaKs\_Calculator2.0 software using the Model Average (MA) method. Ka/Ks values below 1.0 indicate purifying selection.
